# Supplementary material for: Natural mortality estimates throughout the life history of the sea cucumber Isostichopus Badionotus (Holothuroidea: Aspidochirotida)
Source: PeerJ. 2018 Jul 18;6:e5235. doi: 10.7717/peerj.5235 (PMC6054788; doi:10.7717/peerj.5235)
Supplement: Supplemental Information 1 — Raw data (simulated data, Fig. 2). [file peerj-06-5235-s001.xlsx]

## Sheet: Early Maturation (1.5 years)
EA	MA	LA	D+P	J	A
640.827	427.218	213.609	116.514	2.33878	0.422988
655.585	437.057	218.528	119.197	2.39265	0.432729
485.781	323.854	161.927	88.3238	1.77292	0.320647			Stage	Name
590.406	393.604	196.802	107.347	2.15477	0.389706			EA	Early auricularia
641.481	427.654	213.827	116.633	2.34117	0.42342			MA	Mid auricularia
652.007	434.672	217.336	118.547	2.37959	0.430367			LA	Late auricularia
559.72	373.146	186.573	101.767	2.04277	0.369452			D+P	Doliolaria + pentactula
640.692	427.128	213.564	116.489	2.33829	0.422898			J	Juvenile
595.619	397.079	198.54	108.294	2.17379	0.393147			A	Adult
630.6	420.4	210.2	114.655	2.30146	0.416237
656.282	437.521	218.761	119.324	2.39519	0.433189
637.048	424.699	212.349	115.827	2.32499	0.420493
642.543	428.362	214.181	116.826	2.34505	0.424121
651.02	434.014	217.007	118.367	2.37599	0.429716			These results were obtained from GIM model software authors not have permissions tu upload software, this must be request to authors of the software:
543.512	362.341	181.171	98.8203	1.98362	0.358753			Morales-Bojórquez E, Martínez-Aguilar S, Arreguín-Sánchez F, Ramírez-Rodríguez M. 2003. GIM, programa computarizado para estimar la mortalidad natural y duración de los estadios del ciclo de vida de recursos pesqueros, basado sobre división de tiempo gnomónico. Centro Regional de Investigación Pesquera de La Paz del INP, Centro Interdisciplinario de Ciencias Marinas del IPN. 19p.
620.247	413.498	206.749	112.772	2.26368	0.409404
650.802	433.868	216.934	118.328	2.37519	0.429572
654.235	436.157	218.078	118.952	2.38772	0.431838			Input Data were upload as Supplementary files ( Input_data.docx)
611.105	407.403	203.702	111.11	2.23031	0.403369
581.844	387.896	193.948	105.79	2.12352	0.384055
642.495	428.33	214.165	116.817	2.34487	0.424089
577.788	385.192	192.596	105.052	2.10872	0.381378
448.042	298.695	149.347	81.4623	1.63519	0.295737
619.164	412.776	206.388	112.575	2.25972	0.408689
574.142	382.762	191.381	104.39	2.09541	0.378971
530.09	353.393	176.697	96.38	1.93464	0.349894
648.648	432.432	216.216	117.936	2.36733	0.42815
607.341	404.894	202.447	110.426	2.21657	0.400885
635.753	423.835	211.918	115.591	2.32027	0.419639
444.833	296.555	148.278	80.8786	1.62348	0.293618
626.345	417.563	208.782	113.881	2.28593	0.413428
482.161	321.441	160.72	87.6656	1.75971	0.318258
645.652	430.435	215.217	117.391	2.35639	0.426172
633.34	422.227	211.113	115.153	2.31146	0.418046
587.074	391.383	195.691	106.741	2.14261	0.387507
654.983	436.656	218.328	119.088	2.39045	0.432332
631.093	420.728	210.364	114.744	2.30326	0.416562
655.64	437.093	218.547	119.207	2.39285	0.432765
635.902	423.935	211.967	115.619	2.32081	0.419737
605.793	403.862	201.931	110.144	2.21092	0.399863
642.8	428.533	214.267	116.873	2.34598	0.42429
657.037	438.024	219.012	119.461	2.39794	0.433687
640.353	426.902	213.451	116.428	2.33705	0.422674
578.457	385.638	192.819	105.174	2.11116	0.381819
467.918	311.946	155.973	85.0761	1.70773	0.308857
653.662	435.775	217.887	118.848	2.38563	0.43146
656.502	437.668	218.834	119.364	2.39599	0.433334
656.931	437.954	218.977	119.442	2.39756	0.433617
657.601	438.401	219.2	119.564	2.4	0.434059
652.059	434.706	217.353	118.556	2.37978	0.430402
650.015	433.343	216.672	118.185	2.37232	0.429052
635.449	423.633	211.816	115.536	2.31916	0.419438
565.1	376.733	188.367	102.745	2.06241	0.373003
657.658	438.439	219.219	119.574	2.40021	0.434097
649.501	433.001	216.5	118.091	2.37044	0.428713
658.893	439.262	219.631	119.799	2.40472	0.434912
649.486	432.991	216.495	118.088	2.37039	0.428703
651.283	434.189	217.094	118.415	2.37695	0.42989
554.931	369.954	184.977	100.897	2.0253	0.366291
642.225	428.15	214.075	116.768	2.34389	0.42391
643.752	429.168	214.584	117.046	2.34946	0.424919
495.37	330.247	165.123	90.0673	1.80792	0.326977
522.213	348.142	174.071	94.9479	1.90589	0.344695
637.728	425.152	212.576	115.951	2.32747	0.420942
496.207	330.805	165.402	90.2195	1.81097	0.327529
536.74	357.826	178.913	97.589	1.9589	0.354283
649.014	432.676	216.338	118.002	2.36866	0.428391
575.516	383.677	191.839	104.639	2.10042	0.379878
502.478	334.985	167.493	91.3596	1.83386	0.331668
652.594	435.062	217.531	118.653	2.38173	0.430754
630.135	420.09	210.045	114.57	2.29976	0.41593
619.548	413.032	206.516	112.645	2.26113	0.408942
610.726	407.151	203.575	111.041	2.22893	0.403119
574.002	382.668	191.334	104.364	2.0949	0.378879
625.128	416.752	208.376	113.66	2.28149	0.412625
649.131	432.754	216.377	118.024	2.36909	0.428469
520.053	346.702	173.351	94.5551	1.898	0.343269
650.723	433.816	216.908	118.313	2.3749	0.42952
626.468	417.645	208.823	113.903	2.28638	0.41351
612.148	408.099	204.049	111.3	2.23412	0.404057
610.538	407.025	203.513	111.007	2.22824	0.402995
605.525	403.683	201.842	110.095	2.20995	0.399686
542.483	361.655	180.828	98.6333	1.97987	0.358074
638.017	425.345	212.672	116.003	2.32853	0.421133
567.058	378.039	189.019	103.102	2.06956	0.374295
522.125	348.083	174.042	94.9318	1.90557	0.344637
489.778	326.519	163.259	89.0506	1.78751	0.323286
633.706	422.471	211.235	115.219	2.3128	0.418288
649.465	432.976	216.488	118.084	2.37031	0.428689
568.676	379.118	189.559	103.396	2.07546	0.375363
649.085	432.723	216.362	118.015	2.36892	0.428439
585.589	390.392	195.196	106.471	2.13718	0.386527
656.192	437.461	218.731	119.308	2.39486	0.43313
628.031	418.687	209.344	114.187	2.29208	0.414541
645.904	430.603	215.301	117.437	2.35731	0.426339
630.361	420.241	210.12	114.611	2.30059	0.416079
654.252	436.168	218.084	118.955	2.38778	0.431849
612.331	408.221	204.11	111.333	2.23479	0.404179
651.997	434.664	217.332	118.545	2.37955	0.43036
650.98	433.987	216.993	118.36	2.37584	0.429689
621.916	414.611	207.305	113.076	2.26977	0.410505
637.69	425.127	212.563	115.944	2.32734	0.420917
623.688	415.792	207.896	113.398	2.27623	0.411675
601.389	400.926	200.463	109.343	2.19485	0.396956
606.566	404.377	202.189	110.285	2.21374	0.400373
658.47	438.98	219.49	119.722	2.40318	0.434633
571.577	381.052	190.526	103.923	2.08605	0.377278
656.333	437.555	218.778	119.333	2.39538	0.433223
641.377	427.585	213.792	116.614	2.34079	0.423351
606.799	404.533	202.266	110.327	2.21459	0.400527
562.001	374.667	187.334	102.182	2.0511	0.370957
632.061	421.374	210.687	114.92	2.30679	0.417202
576.335	384.224	192.112	104.788	2.10341	0.380419
650.72	433.813	216.907	118.313	2.37489	0.429518
610.802	407.202	203.601	111.055	2.22921	0.403169
658.985	439.323	219.662	119.815	2.40505	0.434973
523.606	349.071	174.535	95.2012	1.91097	0.345614
632.747	421.831	210.916	115.045	2.30929	0.417654
579.564	386.376	193.188	105.375	2.1152	0.38255
629.352	419.568	209.784	114.428	2.29691	0.415414
622.764	415.176	207.588	113.23	2.27286	0.411065
613.601	409.067	204.534	111.564	2.23942	0.405017
655.384	436.923	218.461	119.161	2.39191	0.432596
589.586	393.057	196.529	107.197	2.15177	0.389165
645.586	430.391	215.195	117.379	2.35615	0.426129
656.637	437.758	218.879	119.389	2.39649	0.433423
592.495	394.996	197.498	107.726	2.16239	0.391085
560.177	373.451	186.726	101.85	2.04444	0.369753
625.791	417.194	208.597	113.78	2.28391	0.413063
625.601	417.067	208.534	113.746	2.28322	0.412938
648.093	432.062	216.031	117.835	2.3653	0.427784
538.591	359.06	179.53	97.9256	1.96566	0.355505
655.042	436.695	218.347	119.099	2.39066	0.43237
633.178	422.119	211.059	115.123	2.31087	0.417939
556.872	371.248	185.624	101.249	2.03238	0.367572
654.387	436.258	218.129	118.979	2.38827	0.431938
501.666	334.444	167.222	91.2121	1.8309	0.331132
597.864	398.576	199.288	108.703	2.18199	0.394629
650.424	433.616	216.808	118.259	2.37381	0.429322
657.513	438.342	219.171	119.548	2.39968	0.434001
650.507	433.671	216.836	118.274	2.37411	0.429377
471.736	314.491	157.245	85.7702	1.72166	0.311376
462.698	308.466	154.233	84.127	1.68868	0.305411
601.699	401.132	200.566	109.4	2.19598	0.39716
624.184	416.123	208.061	113.488	2.27804	0.412002
653.721	435.814	217.907	118.858	2.38584	0.431499
579.179	386.119	193.06	105.305	2.11379	0.382296
550.56	367.04	183.52	100.102	2.00934	0.363406
557.763	371.842	185.921	101.412	2.03563	0.36816
538.395	358.93	179.465	97.89	1.96495	0.355376
651.818	434.545	217.273	118.512	2.3789	0.430242
631.739	421.159	210.58	114.862	2.30562	0.416989
573.839	382.559	191.28	104.334	2.0943	0.378771
555.537	370.358	185.179	101.007	2.02751	0.36669
645.669	430.446	215.223	117.394	2.35646	0.426184
631.001	420.668	210.334	114.728	2.30293	0.416502
633.167	422.111	211.056	115.121	2.31083	0.417931
611.238	407.492	203.746	111.134	2.2308	0.403457
600.122	400.081	200.041	109.113	2.19022	0.396119
588.811	392.541	196.27	107.057	2.14895	0.388654
581.304	387.536	193.768	105.692	2.12155	0.383698
613.421	408.947	204.474	111.531	2.23876	0.404898
621.478	414.319	207.159	112.996	2.26817	0.410216
606.989	404.659	202.33	110.362	2.21529	0.400652
656.857	437.905	218.952	119.429	2.39729	0.433569
642.558	428.372	214.186	116.829	2.3451	0.42413
621.032	414.022	207.011	112.915	2.26654	0.409922
650.646	433.764	216.882	118.299	2.37462	0.429469
626.686	417.791	208.895	113.943	2.28717	0.413653
522.239	348.16	174.08	94.9526	1.90598	0.344712
641.238	427.492	213.746	116.589	2.34029	0.423259
653.815	435.877	217.938	118.876	2.38619	0.431561
585.485	390.323	195.162	106.452	2.13681	0.386458
550.537	367.025	183.512	100.098	2.00926	0.363391
643	428.666	214.333	116.909	2.34671	0.424422
591.839	394.56	197.28	107.607	2.16	0.390653
572.348	381.565	190.783	104.063	2.08886	0.377787
654.224	436.15	218.075	118.95	2.38768	0.431831
656.466	437.644	218.822	119.357	2.39586	0.43331
645.157	430.105	215.052	117.301	2.35459	0.425846
537.358	358.239	179.119	97.7015	1.96116	0.354691
603.985	402.656	201.328	109.815	2.20432	0.398669
614.788	409.859	204.929	111.78	2.24375	0.4058
617.048	411.365	205.683	112.191	2.252	0.407292
622.216	414.811	207.405	113.13	2.27086	0.410703
609.428	406.286	203.143	110.805	2.22419	0.402263
656.003	437.335	218.668	119.273	2.39417	0.433005
637.275	424.85	212.425	115.868	2.32582	0.420643
647.103	431.402	215.701	117.655	2.36169	0.42713
606.257	404.171	202.086	110.228	2.21262	0.400169
588.512	392.342	196.171	107.002	2.14786	0.388457
510.032	340.021	170.011	92.7331	1.86143	0.336654
638.978	425.986	212.993	116.178	2.33204	0.421767
631.831	421.221	210.61	114.878	2.30595	0.41705
584.463	389.642	194.821	106.266	2.13308	0.385784
642.088	428.059	214.029	116.743	2.34339	0.42382
600.8	400.533	200.267	109.236	2.1927	0.396567
490.579	327.053	163.526	89.1962	1.79044	0.323814
585.279	390.186	195.093	106.414	2.13605	0.386322
542.763	361.842	180.921	98.6841	1.98089	0.358259
618.786	412.524	206.262	112.507	2.25834	0.408439
596.886	397.924	198.962	108.525	2.17842	0.393984
626.078	417.385	208.693	113.832	2.28496	0.413252
624.064	416.043	208.021	113.466	2.27761	0.411923
658.055	438.703	219.352	119.646	2.40166	0.434359
650.257	433.505	216.752	118.229	2.3732	0.429212
525.987	350.658	175.329	95.634	1.91966	0.347186
595.714	397.142	198.571	108.312	2.17414	0.39321
646.367	430.911	215.456	117.521	2.359	0.426644
656.591	437.727	218.864	119.38	2.39632	0.433393
563.22	375.48	187.74	102.404	2.05555	0.371762
607.243	404.829	202.414	110.408	2.21622	0.40082
624.028	416.019	208.009	113.46	2.27748	0.411899
617.635	411.757	205.878	112.297	2.25414	0.407679
655.244	436.829	218.415	119.135	2.3914	0.432504
583.178	388.785	194.393	106.032	2.12839	0.384935
617.153	411.436	205.718	112.21	2.25238	0.407362
644.186	429.457	214.729	117.125	2.35104	0.425205
644.401	429.601	214.8	117.164	2.35183	0.425347
583.143	388.762	194.381	106.026	2.12826	0.384913
641.391	427.594	213.797	116.617	2.34084	0.42336
655.953	437.302	218.651	119.264	2.39399	0.432972
659.308	439.539	219.769	119.874	2.40623	0.435186
640.749	427.166	213.583	116.5	2.3385	0.422936
637.3	424.867	212.433	115.873	2.32591	0.42066
654.032	436.022	218.011	118.915	2.38698	0.431704
654.796	436.531	218.265	119.054	2.38977	0.432208
589.694	393.13	196.565	107.217	2.15217	0.389237
588.016	392.011	196.005	106.912	2.14604	0.388129
599.067	399.378	199.689	108.921	2.18638	0.395424
544.636	363.091	181.545	99.0247	1.98772	0.359495
605.704	403.803	201.901	110.128	2.2106	0.399804
582.693	388.462	194.231	105.944	2.12662	0.384616
631.937	421.292	210.646	114.898	2.30634	0.41712
625.369	416.913	208.456	113.703	2.28237	0.412784
580.693	387.128	193.564	105.58	2.11932	0.383295
497.736	331.824	165.912	90.4975	1.81656	0.328538
649.051	432.701	216.35	118.009	2.3688	0.428416
579.381	386.254	193.127	105.342	2.11453	0.382429
605.171	403.447	201.724	110.031	2.20865	0.399452
510.983	340.655	170.328	92.906	1.8649	0.337282
638.867	425.911	212.956	116.158	2.33163	0.421694
627.694	418.463	209.231	114.126	2.29085	0.414319
578.411	385.607	192.804	105.166	2.11099	0.381789
603.16	402.106	201.053	109.665	2.20131	0.398125
565.886	377.258	188.629	102.888	2.06528	0.373522
638.108	425.405	212.703	116.02	2.32886	0.421193
643.599	429.066	214.533	117.018	2.3489	0.424817
591.347	394.231	197.116	107.518	2.1582	0.390328
631.14	420.76	210.38	114.753	2.30343	0.416594
638.64	425.76	212.88	116.116	2.3308	0.421544
632.205	421.47	210.735	114.946	2.30732	0.417296
602.92	401.947	200.973	109.622	2.20044	0.397967
646.607	431.071	215.536	117.565	2.35988	0.426803
634.557	423.038	211.519	115.374	2.3159	0.418849
637.502	425.001	212.501	115.909	2.32665	0.420793
625.78	417.187	208.593	113.778	2.28387	0.413056
640.721	427.147	213.574	116.495	2.3384	0.422918
659.127	439.418	219.709	119.841	2.40557	0.435067
598.803	399.202	199.601	108.873	2.18541	0.395249
611.302	407.534	203.767	111.146	2.23103	0.403499
641.885	427.923	213.962	116.706	2.34265	0.423686
607.279	404.853	202.426	110.414	2.21635	0.400844
633.56	422.373	211.187	115.193	2.31226	0.418191
654.929	436.619	218.31	119.078	2.39025	0.432296
627.427	418.284	209.142	114.078	2.28988	0.414143
576.225	384.15	192.075	104.768	2.10301	0.380346
653.446	435.63	217.815	118.808	2.38484	0.431317
654.859	436.573	218.286	119.065	2.39	0.43225
626.378	417.586	208.793	113.887	2.28605	0.413451
644.465	429.643	214.822	117.175	2.35206	0.425389
600.916	400.611	200.305	109.257	2.19312	0.396644
657.089	438.059	219.03	119.471	2.39813	0.433721
629.336	419.557	209.779	114.425	2.29685	0.415403
583.496	388.998	194.499	106.09	2.12955	0.385146
527.91	351.94	175.97	95.9836	1.92668	0.348455
530.688	353.792	176.896	96.4887	1.93682	0.350289
649.067	432.711	216.356	118.012	2.36886	0.428426
616.927	411.285	205.642	112.169	2.25156	0.407212
647.455	431.636	215.818	117.719	2.36297	0.427362
603.848	402.565	201.283	109.791	2.20382	0.398579
648.101	432.068	216.034	117.837	2.36533	0.427789
644.342	429.561	214.781	117.153	2.35161	0.425308
622.537	415.025	207.512	113.189	2.27203	0.410915
650.646	433.764	216.882	118.299	2.37462	0.429469
644.972	429.981	214.991	117.268	2.35391	0.425724
587.688	391.792	195.896	106.852	2.14485	0.387912
581.798	387.866	193.933	105.782	2.12335	0.384025
648.793	432.529	216.264	117.962	2.36786	0.428246
651.943	434.629	217.314	118.535	2.37936	0.430325
617.961	411.974	205.987	112.357	2.25533	0.407894
569.552	379.701	189.851	103.555	2.07866	0.375941
658.313	438.875	219.438	119.693	2.4026	0.434529
628.912	419.275	209.637	114.348	2.2953	0.415123
657.67	438.447	219.223	119.576	2.40026	0.434105
641.488	427.658	213.829	116.634	2.3412	0.423424
652.596	435.064	217.532	118.654	2.38174	0.430756
523.851	349.234	174.617	95.2456	1.91186	0.345776
625.425	416.95	208.475	113.714	2.28257	0.412821
615.889	410.593	205.296	111.98	2.24777	0.406527
605.972	403.981	201.991	110.177	2.21158	0.399981
647.312	431.541	215.771	117.693	2.36245	0.427268
624.591	416.394	208.197	113.562	2.27953	0.412271
595.798	397.199	198.599	108.327	2.17445	0.393266
583.664	389.109	194.555	106.121	2.13016	0.385256
597.15	398.1	199.05	108.573	2.17938	0.394158
644.565	429.71	214.855	117.194	2.35243	0.425455
637.149	424.766	212.383	115.845	2.32536	0.42056
645.574	430.383	215.191	117.377	2.35611	0.426121
657.354	438.236	219.118	119.519	2.3991	0.433897
642.751	428.501	214.25	116.864	2.34581	0.424258
631.449	420.966	210.483	114.809	2.30456	0.416797
636.381	424.254	212.127	115.706	2.32256	0.420053
643.654	429.103	214.551	117.028	2.3491	0.424854
599.79	399.86	199.93	109.053	2.18901	0.3959
602.425	401.617	200.808	109.532	2.19863	0.39764
454.239	302.826	151.413	82.5888	1.65781	0.299827
627.429	418.286	209.143	114.078	2.28989	0.414144
555.649	370.433	185.216	101.027	2.02792	0.366765
576.347	384.231	192.116	104.79	2.10346	0.380427
574.082	382.721	191.361	104.378	2.09519	0.378931
657.549	438.366	219.183	119.554	2.39981	0.434025
594.258	396.172	198.086	108.047	2.16882	0.392249
552.487	368.325	184.162	100.452	2.01638	0.364677
658.873	439.249	219.624	119.795	2.40465	0.434899
628.423	418.949	209.474	114.259	2.29351	0.4148
641.035	427.357	213.678	116.552	2.33955	0.423125
527.288	351.525	175.763	95.8705	1.92441	0.348044
596.552	397.702	198.851	108.464	2.1772	0.393764
638.192	425.461	212.731	116.035	2.32917	0.421248
578.813	385.875	192.938	105.239	2.11245	0.382054
559.441	372.961	186.48	101.717	2.04175	0.369267
588.392	392.262	196.131	106.98	2.14742	0.388377
642.021	428.014	214.007	116.731	2.34314	0.423776
481.566	321.044	160.522	87.5574	1.75754	0.317865
620.026	413.351	206.675	112.732	2.26287	0.409258
636.143	424.096	212.048	115.662	2.32169	0.419896
603.28	402.187	201.093	109.687	2.20175	0.398204
652.266	434.844	217.422	118.594	2.38053	0.430538
647.14	431.427	215.713	117.662	2.36183	0.427155
658.732	439.155	219.577	119.769	2.40413	0.434806
654.272	436.182	218.091	118.959	2.38786	0.431862
637.174	424.783	212.391	115.85	2.32545	0.420577
602.336	401.558	200.779	109.516	2.19831	0.397581
651.262	434.174	217.087	118.411	2.37687	0.429875
631.607	421.071	210.536	114.838	2.30514	0.416902
646.096	430.731	215.365	117.472	2.35802	0.426466
590.338	393.559	196.779	107.334	2.15452	0.389661
618.617	412.411	206.206	112.476	2.25773	0.408328
645.82	430.547	215.273	117.422	2.35701	0.426284
629.203	419.469	209.734	114.401	2.29636	0.415315
572.021	381.347	190.674	104.004	2.08767	0.377571
589.206	392.804	196.402	107.128	2.15039	0.388914
638.287	425.524	212.762	116.052	2.32951	0.421311
615.956	410.637	205.319	111.992	2.24802	0.406571
656.09	437.394	218.697	119.289	2.39449	0.433062
612.278	408.185	204.093	111.323	2.23459	0.404144
657.44	438.293	219.147	119.535	2.39942	0.433953
643.935	429.29	214.645	117.079	2.35013	0.425039
630.381	420.254	210.127	114.615	2.30066	0.416093
626.028	417.352	208.676	113.823	2.28477	0.413219
657.573	438.382	219.191	119.559	2.3999	0.434041
652.431	434.954	217.477	118.624	2.38113	0.430647
650.55	433.7	216.85	118.282	2.37427	0.429406
584.498	389.665	194.833	106.272	2.1332	0.385807
607.806	405.204	202.602	110.51	2.21827	0.401192
655.573	437.049	218.524	119.195	2.3926	0.432721
617.137	411.425	205.712	112.207	2.25232	0.407351
492.882	328.588	164.294	89.615	1.79884	0.325335
578.807	385.871	192.936	105.238	2.11244	0.382051
643.406	428.937	214.469	116.983	2.3482	0.42469
643.855	429.237	214.618	117.065	2.34984	0.424986
645.461	430.307	215.154	117.356	2.3557	0.426046
640.361	426.907	213.454	116.429	2.33708	0.42268
520.422	346.948	173.474	94.6222	1.89935	0.343513
594.748	396.499	198.249	108.136	2.17061	0.392573
655.504	437.003	218.501	119.183	2.39235	0.432675
604.072	402.714	201.357	109.831	2.20464	0.398727
579.855	386.57	193.285	105.428	2.11626	0.382742
564.985	376.657	188.328	102.725	2.06199	0.372927
621.466	414.311	207.155	112.994	2.26812	0.410208
638.72	425.814	212.907	116.131	2.3311	0.421597
478.245	318.83	159.415	86.9536	1.74542	0.315673
624.269	416.179	208.09	113.503	2.27835	0.412058
648.038	432.026	216.013	117.825	2.3651	0.427748
586.486	390.991	195.495	106.634	2.14046	0.387119
627.791	418.527	209.264	114.144	2.29121	0.414383
654.449	436.299	218.15	118.991	2.3885	0.431979
614.176	409.45	204.725	111.668	2.24152	0.405396
658.847	439.231	219.616	119.79	2.40455	0.434882
646.715	431.143	215.572	117.585	2.36027	0.426874
615.708	410.472	205.236	111.947	2.24711	0.406408
652.082	434.721	217.361	118.56	2.37986	0.430417
641.394	427.596	213.798	116.617	2.34085	0.423362
629.233	419.489	209.744	114.406	2.29647	0.415335
642.416	428.277	214.139	116.803	2.34458	0.424037
656.351	437.567	218.784	119.336	2.39544	0.433234
541.704	361.136	180.568	98.4916	1.97702	0.35756
644.832	429.888	214.944	117.242	2.3534	0.425631
646.136	430.757	215.379	117.479	2.35816	0.426492
650.341	433.56	216.78	118.244	2.37351	0.429267
655.302	436.868	218.434	119.146	2.39161	0.432542
630.296	420.197	210.099	114.599	2.30035	0.416036
566.391	377.594	188.797	102.98	2.06712	0.373855
565.194	376.796	188.398	102.763	2.06275	0.373065
542.859	361.906	180.953	98.7016	1.98124	0.358322
611.164	407.443	203.721	111.121	2.23053	0.403408
637.773	425.182	212.591	115.959	2.32764	0.420972
538.341	358.894	179.447	97.8801	1.96475	0.35534
646.88	431.253	215.627	117.615	2.36088	0.426983
596.266	397.511	198.755	108.412	2.17615	0.393575
624.545	416.363	208.182	113.554	2.27936	0.41224
462.242	308.161	154.081	84.0439	1.68701	0.30511
566.908	377.938	188.969	103.074	2.06901	0.374196
627.237	418.158	209.079	114.043	2.28919	0.414017
652.554	435.036	217.518	118.646	2.38158	0.430728
605.118	403.412	201.706	110.021	2.20846	0.399417
629.97	419.98	209.99	114.54	2.29916	0.415821
652.762	435.175	217.587	118.684	2.38234	0.430865
631.789	421.192	210.596	114.871	2.3058	0.417022
597.704	398.469	199.235	108.673	2.1814	0.394524
599.522	399.681	199.841	109.004	2.18803	0.395723
655.193	436.795	218.398	119.126	2.39121	0.43247
626.487	417.658	208.829	113.907	2.28645	0.413522
637.511	425.008	212.504	115.911	2.32668	0.420799
581.116	387.411	193.705	105.657	2.12086	0.383575
635.358	423.572	211.786	115.52	2.31882	0.419377
612.356	408.238	204.119	111.338	2.23488	0.404195
608.905	405.937	202.968	110.71	2.22228	0.401917
546.437	364.291	182.146	99.3521	1.99429	0.360684
648.899	432.599	216.3	117.982	2.36824	0.428315
645.1	430.066	215.033	117.291	2.35438	0.425808
657.169	438.113	219.056	119.485	2.39843	0.433774
560.862	373.908	186.954	101.975	2.04694	0.370205
621.24	414.16	207.08	112.953	2.2673	0.410059
628.809	419.206	209.603	114.329	2.29492	0.415055
654.684	436.456	218.228	119.033	2.38936	0.432134
638.872	425.915	212.957	116.159	2.33165	0.421697
589.288	392.859	196.429	107.143	2.15069	0.388969
638.87	425.913	212.957	116.158	2.33164	0.421696
525.873	350.582	175.291	95.6132	1.91924	0.34711
599.627	399.751	199.876	109.023	2.18842	0.395793
656.217	437.478	218.739	119.312	2.39495	0.433146
651.371	434.247	217.124	118.431	2.37727	0.429947
639.054	426.036	213.018	116.192	2.33231	0.421817
548.271	365.514	182.757	99.6856	2.00099	0.361894
636.683	424.455	212.228	115.76	2.32366	0.420252
644.446	429.63	214.815	117.172	2.35199	0.425376
636.337	424.225	212.112	115.698	2.3224	0.420024
615.707	410.471	205.236	111.947	2.2471	0.406407
640.051	426.701	213.35	116.373	2.33595	0.422476
656.281	437.521	218.76	119.324	2.39519	0.433188
589.129	392.753	196.376	107.114	2.15011	0.388864
636.484	424.323	212.161	115.724	2.32293	0.420121
646.718	431.145	215.573	117.585	2.36028	0.426876
657.326	438.217	219.109	119.514	2.399	0.433878
656.908	437.939	218.969	119.438	2.39747	0.433602
626.594	417.729	208.865	113.926	2.28684	0.413593
636.998	424.666	212.333	115.818	2.32481	0.42046
657.376	438.25	219.125	119.523	2.39918	0.433911
547.489	364.993	182.496	99.5435	1.99814	0.361379
577.315	384.877	192.438	104.966	2.10699	0.381066
602.563	401.708	200.854	109.557	2.19913	0.397731
657.976	438.651	219.325	119.632	2.40137	0.434307
629.861	419.907	209.954	114.52	2.29876	0.415749
643.596	429.064	214.532	117.017	2.34889	0.424815
656.145	437.43	218.715	119.299	2.39469	0.433098
533.042	355.361	177.681	96.9167	1.94541	0.351842
630.17	420.113	210.057	114.576	2.29989	0.415953
630.179	420.12	210.06	114.578	2.29993	0.41596
564.169	376.113	188.056	102.576	2.05901	0.372389
649.512	433.008	216.504	118.093	2.37048	0.42872
626.276	417.517	208.759	113.868	2.28568	0.413383
645.527	430.352	215.176	117.369	2.35594	0.42609
616.752	411.168	205.584	112.137	2.25092	0.407097
601.943	401.295	200.648	109.444	2.19687	0.397322
631.811	421.207	210.604	114.875	2.30588	0.417036
649.982	433.321	216.661	118.178	2.3722	0.42903
642.286	428.19	214.095	116.779	2.34411	0.42395
593.102	395.401	197.701	107.837	2.1646	0.391486
654.485	436.323	218.162	118.997	2.38863	0.432003
641.378	427.585	213.793	116.614	2.3408	0.423351
644.395	429.597	214.798	117.163	2.35181	0.425343
587.835	391.89	195.945	106.879	2.14538	0.38801
655.297	436.865	218.432	119.145	2.3916	0.432539
467.611	311.741	155.87	85.0202	1.70661	0.308654
588.427	392.285	196.142	106.987	2.14755	0.3884
650.991	433.994	216.997	118.362	2.37588	0.429697
654.412	436.274	218.137	118.984	2.38836	0.431954
657.761	438.507	219.254	119.593	2.40059	0.434165
648.682	432.455	216.227	117.942	2.36745	0.428173
658.93	439.287	219.643	119.805	2.40485	0.434937
628.29	418.86	209.43	114.235	2.29303	0.414713
648.618	432.412	216.206	117.931	2.36722	0.42813
575.271	383.514	191.757	104.595	2.09953	0.379716
624.464	416.31	208.155	113.539	2.27907	0.412187
582.605	388.403	194.202	105.928	2.12629	0.384557
645.185	430.124	215.062	117.306	2.35469	0.425864
565.28	376.854	188.427	102.778	2.06307	0.373122
563.725	375.817	187.908	102.495	2.05739	0.372095
626.021	417.348	208.674	113.822	2.28475	0.413215
654.454	436.303	218.151	118.992	2.38852	0.431982
624.708	416.472	208.236	113.583	2.27996	0.412348
640.106	426.737	213.369	116.383	2.33615	0.422511
657.033	438.022	219.011	119.461	2.39793	0.433685
641.902	427.935	213.967	116.709	2.34271	0.423697
635.513	423.675	211.838	115.548	2.31939	0.41948
643.537	429.024	214.512	117.007	2.34867	0.424776
643.849	429.233	214.616	117.063	2.34981	0.424982
640.286	426.857	213.429	116.416	2.33681	0.42263
652.653	435.102	217.551	118.664	2.38194	0.430793
569.25	379.5	189.75	103.5	2.07756	0.375742
647.572	431.715	215.857	117.74	2.3634	0.42744
658.281	438.854	219.427	119.687	2.40248	0.434508
527.755	351.836	175.918	95.9554	1.92611	0.348352
623.072	415.381	207.691	113.286	2.27399	0.411268
642.503	428.335	214.168	116.819	2.3449	0.424094
629.524	419.683	209.841	114.459	2.29753	0.415527
628.902	419.268	209.634	114.346	2.29526	0.415117
585.728	390.485	195.243	106.496	2.13769	0.386619
590.76	393.84	196.92	107.411	2.15606	0.38994
617.067	411.378	205.689	112.194	2.25207	0.407304
545.718	363.812	181.906	99.2214	1.99167	0.360209
643.95	429.3	214.65	117.082	2.35018	0.425049
590.184	393.456	196.728	107.306	2.15395	0.38956
616.255	410.837	205.418	112.046	2.24911	0.406769
654.055	436.037	218.018	118.919	2.38706	0.431719
563.595	375.73	187.865	102.472	2.05691	0.372009
635.264	423.509	211.755	115.503	2.31848	0.419316
580.599	387.066	193.533	105.563	2.11897	0.383233
657.546	438.364	219.182	119.554	2.3998	0.434023
629.324	419.55	209.775	114.423	2.2968	0.415395
636.427	424.284	212.142	115.714	2.32273	0.420083
618.331	412.221	206.11	112.424	2.25668	0.408139
657.089	438.06	219.03	119.471	2.39814	0.433722
617.737	411.824	205.912	112.316	2.25451	0.407746
573.368	382.245	191.123	104.249	2.09258	0.37846
532.741	355.161	177.58	96.862	1.94431	0.351644
574.102	382.734	191.367	104.382	2.09526	0.378945
655.08	436.72	218.36	119.105	2.3908	0.432395
635.901	423.934	211.967	115.618	2.32081	0.419736
639.149	426.099	213.05	116.209	2.33266	0.42188
547.422	364.948	182.474	99.5313	1.99789	0.361334
582.183	388.122	194.061	105.851	2.12476	0.384279
643.601	429.067	214.534	117.018	2.34891	0.424818
596.648	397.765	198.883	108.481	2.17755	0.393827
637.155	424.77	212.385	115.846	2.32538	0.420564
636.615	424.41	212.205	115.748	2.32341	0.420207
643.044	428.696	214.348	116.917	2.34688	0.424451
645.88	430.587	215.293	117.433	2.35723	0.426323
444.078	296.052	148.026	80.7414	1.62072	0.29312
637.088	424.726	212.363	115.834	2.32514	0.42052
647.979	431.986	215.993	117.814	2.36489	0.427708
559.209	372.806	186.403	101.674	2.04091	0.369114
610.706	407.137	203.569	111.037	2.22885	0.403106
640.655	427.103	213.552	116.483	2.33816	0.422874
632.904	421.936	210.968	115.074	2.30987	0.417758
635.507	423.672	211.836	115.547	2.31937	0.419476
635.377	423.585	211.792	115.523	2.3189	0.41939
610.48	406.986	203.493	110.996	2.22803	0.402956
637.521	425.014	212.507	115.913	2.32672	0.420805
592.847	395.231	197.616	107.79	2.16367	0.391317
643.259	428.839	214.42	116.956	2.34766	0.424593
630.807	420.538	210.269	114.692	2.30221	0.416373
646.642	431.094	215.547	117.571	2.36001	0.426826
633.889	422.593	211.296	115.253	2.31346	0.418408
480.316	320.211	160.105	87.3302	1.75298	0.31704
495.386	330.257	165.129	90.0702	1.80798	0.326987
647.666	431.777	215.889	117.757	2.36374	0.427502
656.825	437.884	218.942	119.423	2.39717	0.433548
568.793	379.195	189.598	103.417	2.07589	0.37544
628.836	419.224	209.612	114.334	2.29502	0.415073
585.918	390.612	195.306	106.53	2.13839	0.386744
635.393	423.595	211.798	115.526	2.31895	0.419401
615.37	410.247	205.123	111.886	2.24588	0.406185
619.441	412.96	206.48	112.626	2.26073	0.408871
553.618	369.078	184.539	100.658	2.0205	0.365424
615.441	410.294	205.147	111.898	2.24613	0.406231
590.559	393.706	196.853	107.374	2.15532	0.389807
613.536	409.024	204.512	111.552	2.23918	0.404974
651.927	434.618	217.309	118.532	2.3793	0.430314
622.499	414.999	207.5	113.182	2.27189	0.41089
625.897	417.264	208.632	113.799	2.28429	0.413133
656.708	437.805	218.903	119.401	2.39674	0.43347
636.247	424.165	212.082	115.681	2.32207	0.419965
625.01	416.673	208.337	113.638	2.28106	0.412547
611.441	407.628	203.814	111.171	2.23154	0.403591
608.732	405.822	202.911	110.679	2.22165	0.401803
657.985	438.656	219.328	119.634	2.4014	0.434313
594.19	396.127	198.063	108.035	2.16858	0.392204
654.981	436.654	218.327	119.087	2.39044	0.43233
584.931	389.954	194.977	106.351	2.13478	0.386092
633.984	422.656	211.328	115.27	2.31381	0.418471
624.295	416.197	208.098	113.508	2.27845	0.412076
579.064	386.043	193.021	105.284	2.11337	0.38222
655.236	436.824	218.412	119.134	2.39137	0.432498
533.163	355.442	177.721	96.9387	1.94585	0.351922
491.759	327.839	163.92	89.4107	1.79474	0.324593
445.952	297.302	148.651	81.0822	1.62756	0.294358
655.256	436.837	218.419	119.137	2.39145	0.432512
559.244	372.829	186.415	101.681	2.04104	0.369137
645.747	430.498	215.249	117.409	2.35674	0.426235
617.676	411.784	205.892	112.305	2.25429	0.407706
608.103	405.402	202.701	110.564	2.21935	0.401387
541.558	361.039	180.519	98.4652	1.97649	0.357464
648.54	432.36	216.18	117.916	2.36693	0.428079
586.561	391.041	195.52	106.647	2.14073	0.387169
570.747	380.498	190.249	103.772	2.08302	0.37673
629.594	419.729	209.865	114.472	2.29779	0.415573
626.853	417.902	208.951	113.973	2.28779	0.413764
603.974	402.649	201.325	109.813	2.20428	0.398662
571.007	380.671	190.336	103.819	2.08397	0.376902
568.092	378.728	189.364	103.289	2.07333	0.374978
575.506	383.671	191.835	104.637	2.10039	0.379871
626.247	417.498	208.749	113.863	2.28557	0.413364
651.909	434.606	217.303	118.529	2.37923	0.430303
657.608	438.405	219.203	119.565	2.40003	0.434064
640.935	427.29	213.645	116.534	2.33918	0.423059
620.159	413.439	206.72	112.756	2.26335	0.409345
652.316	434.877	217.439	118.603	2.38071	0.430571
645.67	430.446	215.223	117.394	2.35646	0.426184
517.827	345.218	172.609	94.1503	1.88988	0.341799
642.763	428.509	214.254	116.866	2.34585	0.424265
632.516	421.678	210.839	115.003	2.30845	0.417502
585.694	390.462	195.231	106.49	2.13757	0.386596
639.687	426.458	213.229	116.307	2.33462	0.422235
598.348	398.898	199.449	108.79	2.18375	0.394948
635.134	423.423	211.711	115.479	2.31801	0.41923
612.086	408.058	204.029	111.288	2.23389	0.404017
645.459	430.306	215.153	117.356	2.35569	0.426045
612.553	408.368	204.184	111.373	2.23559	0.404325
573.67	382.447	191.223	104.304	2.09369	0.37866
635.83	423.887	211.943	115.605	2.32055	0.419689
569.196	379.464	189.732	103.49	2.07736	0.375706
621.827	414.551	207.276	113.059	2.26944	0.410446
622.932	415.288	207.644	113.26	2.27347	0.411175
620.081	413.388	206.694	112.742	2.26307	0.409294
623.833	415.888	207.944	113.424	2.27676	0.41177
597.937	398.624	199.312	108.716	2.18225	0.394677
656.31	437.54	218.77	119.329	2.39529	0.433207
629.203	419.469	209.734	114.401	2.29636	0.415315
649.17	432.78	216.39	118.031	2.36923	0.428495
556.814	371.209	185.605	101.239	2.03217	0.367534
624.587	416.391	208.196	113.561	2.27951	0.412268
620.359	413.573	206.786	112.793	2.26408	0.409477
656.548	437.699	218.849	119.372	2.39616	0.433365
601.264	400.843	200.421	109.321	2.1944	0.396874
623.959	415.973	207.986	113.447	2.27722	0.411854
562.225	374.817	187.408	102.223	2.05192	0.371105
643.345	428.896	214.448	116.972	2.34797	0.424649
655.086	436.724	218.362	119.106	2.39082	0.432399
653.113	435.408	217.704	118.748	2.38362	0.431097
629.719	419.812	209.906	114.494	2.29824	0.415655
641.216	427.478	213.739	116.585	2.34021	0.423245
652.685	435.123	217.562	118.67	2.38206	0.430815
531.354	354.236	177.118	96.6098	1.93925	0.350728
644.654	429.769	214.885	117.21	2.35275	0.425514
657.366	438.244	219.122	119.521	2.39915	0.433904
619.354	412.902	206.451	112.61	2.26041	0.408814
589.03	392.687	196.343	107.096	2.14974	0.388798
639.603	426.402	213.201	116.292	2.33432	0.42218
467.318	311.545	155.773	84.9668	1.70554	0.30846
655.708	437.139	218.569	119.22	2.3931	0.43281
626.253	417.502	208.751	113.864	2.2856	0.413368
648.799	432.532	216.266	117.963	2.36788	0.428249
644.831	429.888	214.944	117.242	2.3534	0.425631
619.625	413.084	206.542	112.659	2.26141	0.408993
609.713	406.475	203.238	110.857	2.22523	0.40245
638.468	425.646	212.823	116.085	2.33018	0.421431
628.572	419.048	209.524	114.286	2.29406	0.414898
618.109	412.073	206.036	112.383	2.25587	0.407992
548.029	365.353	182.676	99.6416	2.00011	0.361735
629.618	419.746	209.873	114.476	2.29788	0.415589
497.369	331.579	165.79	90.4307	1.81522	0.328296
651.231	434.154	217.077	118.406	2.37675	0.429855
619.902	413.268	206.634	112.709	2.26242	0.409176
608.066	405.378	202.689	110.558	2.21922	0.401363
531.975	354.65	177.325	96.7227	1.94151	0.351138
626.32	417.547	208.773	113.876	2.28584	0.413412
650.472	433.648	216.824	118.268	2.37398	0.429354
559.221	372.814	186.407	101.677	2.04095	0.369122
546.893	364.596	182.298	99.4352	1.99596	0.360985
606.382	404.255	202.127	110.251	2.21307	0.400252
491.256	327.504	163.752	89.3192	1.7929	0.324261
607.533	405.022	202.511	110.461	2.21727	0.401011
651.671	434.447	217.224	118.486	2.37836	0.430145
623.297	415.531	207.766	113.327	2.27481	0.411416
532.418	354.945	177.473	96.8032	1.94313	0.35143
643.689	429.126	214.563	117.034	2.34923	0.424877
618.055	412.037	206.018	112.374	2.25568	0.407957
567.429	378.286	189.143	103.169	2.07091	0.37454
606.87	404.58	202.29	110.34	2.21485	0.400574
599.183	399.455	199.728	108.942	2.1868	0.3955
651.702	434.468	217.234	118.491	2.37848	0.430166
572.016	381.344	190.672	104.003	2.08765	0.377568
614.315	409.543	204.772	111.694	2.24203	0.405488
639.379	426.253	213.126	116.251	2.3335	0.422032
629.762	419.841	209.921	114.502	2.2984	0.415684
621.565	414.377	207.188	113.012	2.26849	0.410273
589.218	392.812	196.406	107.131	2.15043	0.388923
598.482	398.988	199.494	108.815	2.18424	0.395037
587.455	391.636	195.818	106.81	2.144	0.387758
634.121	422.747	211.374	115.295	2.31431	0.418561
633	422	211	115.091	2.31022	0.417821
527.445	351.63	175.815	95.8991	1.92498	0.348148
613.202	408.802	204.401	111.491	2.23796	0.404754
614.434	409.622	204.811	111.715	2.24246	0.405566
656.882	437.921	218.961	119.433	2.39738	0.433585
505.574	337.049	168.525	91.9225	1.84516	0.333712
610.215	406.81	203.405	110.948	2.22706	0.402782
650.082	433.388	216.694	118.197	2.37256	0.429096
652.548	435.032	217.516	118.645	2.38156	0.430724
632.007	421.338	210.669	114.91	2.3066	0.417166
649.305	432.87	216.435	118.056	2.36973	0.428584
641.081	427.387	213.694	116.56	2.33971	0.423155
637.554	425.036	212.518	115.919	2.32684	0.420827
606.172	404.115	202.057	110.213	2.21231	0.400113
568	378.667	189.333	103.273	2.07299	0.374917
633.473	422.315	211.158	115.177	2.31194	0.418133
649.732	433.155	216.577	118.133	2.37128	0.428865
536.691	357.794	178.897	97.5802	1.95873	0.354251
630.995	420.663	210.332	114.726	2.3029	0.416498
559.596	373.064	186.532	101.745	2.04232	0.36937
655.503	437.002	218.501	119.182	2.39235	0.432675
654.663	436.442	218.221	119.03	2.38928	0.43212
651.749	434.499	217.25	118.5	2.37864	0.430197
658.718	439.145	219.573	119.767	2.40408	0.434797
656.357	437.571	218.786	119.338	2.39546	0.433238
562.602	375.068	187.534	102.291	2.05329	0.371354
656.707	437.804	218.902	119.401	2.39674	0.433469
638.99	425.993	212.997	116.18	2.33208	0.421775
601.035	400.69	200.345	109.279	2.19356	0.396722
584.814	389.876	194.938	106.33	2.13436	0.386015
631.302	420.868	210.434	114.782	2.30402	0.416701
531.497	354.331	177.166	96.6358	1.93977	0.350823
602.757	401.838	200.919	109.592	2.19984	0.397859
486.197	324.131	162.066	88.3994	1.77444	0.320922
636.66	424.44	212.22	115.756	2.32358	0.420237
613.59	409.06	204.53	111.562	2.23938	0.405009
625.735	417.157	208.578	113.77	2.28371	0.413026
653.223	435.482	217.741	118.768	2.38403	0.43117
612.245	408.163	204.082	111.317	2.23447	0.404122
638.486	425.658	212.829	116.088	2.33024	0.421443
657.797	438.531	219.266	119.599	2.40072	0.434189
630.841	420.56	210.28	114.698	2.30234	0.416396
656.305	437.536	218.768	119.328	2.39527	0.433204
642.867	428.578	214.289	116.885	2.34623	0.424334
599.711	399.807	199.904	109.038	2.18873	0.395848
651.068	434.046	217.023	118.376	2.37616	0.429748
584.994	389.996	194.998	106.363	2.13501	0.386134
601.715	401.143	200.572	109.403	2.19604	0.397171
645.839	430.56	215.28	117.425	2.35708	0.426296
648.932	432.622	216.311	117.988	2.36837	0.428338
648.409	432.272	216.136	117.892	2.36646	0.427992
590.288	393.525	196.763	107.325	2.15434	0.389629
641.405	427.603	213.802	116.619	2.34089	0.423369
609.381	406.254	203.127	110.797	2.22402	0.402231
503.684	335.79	167.895	91.579	1.83826	0.332465
613.654	409.103	204.551	111.573	2.23961	0.405052
623.659	415.773	207.886	113.393	2.27613	0.411656
540.304	360.203	180.101	98.2371	1.97191	0.356636
652.847	435.232	217.616	118.7	2.38265	0.430922
520.323	346.882	173.441	94.6041	1.89899	0.343447
654.687	436.458	218.229	119.034	2.38937	0.432136
479.097	319.398	159.699	87.1085	1.74853	0.316235
639.065	426.044	213.022	116.194	2.33236	0.421825
600.806	400.537	200.269	109.237	2.19272	0.396571
580.981	387.321	193.66	105.633	2.12037	0.383485
645.99	430.66	215.33	117.453	2.35763	0.426395
640.647	427.098	213.549	116.481	2.33813	0.422869
633.172	422.115	211.057	115.122	2.31085	0.417935
658.118	438.745	219.373	119.658	2.40189	0.434401
650.854	433.903	216.951	118.337	2.37538	0.429606
593.517	395.678	197.839	107.912	2.16612	0.39176
638.771	425.848	212.924	116.14	2.33128	0.421631
645.616	430.411	215.205	117.385	2.35626	0.426149
645.83	430.553	215.277	117.424	2.35704	0.42629
591.8	394.533	197.267	107.6	2.15985	0.390627
606.766	404.511	202.255	110.321	2.21447	0.400505
657.184	438.123	219.061	119.488	2.39848	0.433784
609.341	406.228	203.114	110.789	2.22387	0.402205
621.243	414.162	207.081	112.953	2.26731	0.410061
606.905	404.604	202.302	110.346	2.21498	0.400597
619.392	412.928	206.464	112.617	2.26055	0.408839
550.281	366.854	183.427	100.051	2.00833	0.363221
644.442	429.628	214.814	117.171	2.35198	0.425374
607.955	405.303	202.652	110.537	2.21881	0.40129
646.27	430.847	215.423	117.504	2.35865	0.42658
573.452	382.301	191.151	104.264	2.09289	0.378516
647.157	431.438	215.719	117.665	2.36189	0.427166
613.135	408.757	204.378	111.479	2.23772	0.404709
593.697	395.798	197.899	107.945	2.16678	0.391879
617.881	411.921	205.96	112.342	2.25504	0.407842
643.992	429.328	214.664	117.089	2.35034	0.425077
605.648	403.766	201.883	110.118	2.2104	0.399767
591.082	394.054	197.027	107.469	2.15723	0.390152
652.046	434.697	217.349	118.554	2.37973	0.430393
627.225	418.15	209.075	114.041	2.28914	0.41401
643.943	429.295	214.648	117.081	2.35016	0.425044
620.833	413.888	206.944	112.879	2.26581	0.40979
445.805	297.203	148.602	81.0554	1.62703	0.29426
556.268	370.845	185.423	101.14	2.03017	0.367173
635.887	423.924	211.962	115.616	2.32075	0.419727
657.332	438.221	219.111	119.515	2.39902	0.433882
629.251	419.5	209.75	114.409	2.29654	0.415346
617.84	411.893	205.947	112.335	2.25489	0.407815
632.731	421.821	210.91	115.042	2.30924	0.417644
620.223	413.482	206.741	112.768	2.26359	0.409388
642.171	428.114	214.057	116.758	2.34369	0.423875
601.915	401.277	200.638	109.439	2.19677	0.397303
617.553	411.702	205.851	112.282	2.25384	0.407625
658.431	438.954	219.477	119.715	2.40303	0.434607
628.629	419.086	209.543	114.296	2.29427	0.414936
646.638	431.092	215.546	117.571	2.35999	0.426823
589.251	392.834	196.417	107.137	2.15055	0.388944
615.991	410.661	205.33	111.998	2.24814	0.406594
596.631	397.754	198.877	108.478	2.17749	0.393815
587.698	391.799	195.899	106.854	2.14488	0.387919
618.118	412.079	206.039	112.385	2.25591	0.407998
656.015	437.343	218.672	119.275	2.39422	0.433013
636.113	424.075	212.038	115.657	2.32158	0.419876
656.013	437.342	218.671	119.275	2.39421	0.433011
652.438	434.959	217.479	118.625	2.38116	0.430652
658.016	438.678	219.339	119.639	2.40152	0.434334
613.073	408.715	204.358	111.468	2.23749	0.404668
621.99	414.66	207.33	113.089	2.27004	0.410554
653.827	435.885	217.942	118.878	2.38623	0.431568
589.883	393.255	196.628	107.251	2.15286	0.389361
635.105	423.403	211.702	115.474	2.3179	0.419211
635.917	423.945	211.972	115.621	2.32087	0.419747
595.206	396.804	198.402	108.219	2.17228	0.392875
535.909	357.273	178.636	97.438	1.95587	0.353735
588.559	392.373	196.186	107.011	2.14803	0.388487
579.007	386.005	193.002	105.274	2.11316	0.382182
632.023	421.349	210.674	114.913	2.30665	0.417177
642.597	428.398	214.199	116.836	2.34524	0.424156
656.858	437.905	218.953	119.429	2.39729	0.433569
601.575	401.05	200.525	109.377	2.19553	0.397078
513.573	342.382	171.191	93.3768	1.87435	0.338991
631.625	421.083	210.542	114.841	2.3052	0.416914
622.088	414.725	207.363	113.107	2.27039	0.410619
645.759	430.506	215.253	117.411	2.35678	0.426243
641.387	427.591	213.796	116.616	2.34083	0.423357
631.878	421.252	210.626	114.887	2.30612	0.417081
611.744	407.829	203.915	111.226	2.23264	0.403791
567.219	378.146	189.073	103.131	2.07014	0.374402
657.378	438.252	219.126	119.523	2.39919	0.433912
618.08	412.053	206.027	112.378	2.25576	0.407973
642.209	428.139	214.07	116.765	2.34383	0.4239
624.011	416.007	208.004	113.456	2.27741	0.411888
611.14	407.427	203.713	111.116	2.23044	0.403392
605.385	403.59	201.795	110.07	2.20943	0.399594
648.044	432.029	216.015	117.826	2.36512	0.427751
629.056	419.37	209.685	114.374	2.29582	0.415218
639.558	426.372	213.186	116.283	2.33415	0.42215
638.4	425.6	212.8	116.073	2.32993	0.421386
569.648	379.765	189.883	103.572	2.07901	0.376005
621.466	414.311	207.155	112.994	2.26813	0.410208
623.996	415.997	207.999	113.454	2.27736	0.411878
641.93	427.953	213.977	116.714	2.34281	0.423715
549.84	366.56	183.28	99.971	2.00672	0.36293
632.231	421.487	210.744	114.951	2.30741	0.417314
626.787	417.858	208.929	113.961	2.28754	0.41372
626.668	417.779	208.889	113.94	2.28711	0.413642
619.398	412.932	206.466	112.618	2.26058	0.408843
654.767	436.511	218.256	119.049	2.38966	0.432189
649.837	433.225	216.612	118.152	2.37167	0.428935
605.67	403.78	201.89	110.122	2.21047	0.399781
603.6	402.4	201.2	109.745	2.20292	0.398416
574.642	383.094	191.547	104.48	2.09723	0.379301
641.866	427.91	213.955	116.703	2.34258	0.423673
653.504	435.67	217.835	118.819	2.38505	0.431356
547.432	364.954	182.477	99.533	1.99793	0.361341
580.099	386.733	193.366	105.473	2.11715	0.382903
649.457	432.971	216.486	118.083	2.37028	0.428684
658.449	438.966	219.483	119.718	2.4031	0.43462
645.18	430.12	215.06	117.305	2.35467	0.425861
640.553	427.035	213.518	116.464	2.33778	0.422807
523.135	348.757	174.378	95.1154	1.90925	0.345303
656.162	437.441	218.721	119.302	2.39475	0.43311
620.067	413.378	206.689	112.739	2.26302	0.409285
608.893	405.929	202.964	110.708	2.22224	0.401909
656.705	437.804	218.902	119.401	2.39674	0.433468
532.71	355.14	177.57	96.8563	1.9442	0.351623
453.809	302.539	151.27	82.5107	1.65624	0.299543
604.427	402.951	201.476	109.896	2.20594	0.398961
539.059	359.373	179.686	98.0108	1.96737	0.355814
659.206	439.471	219.735	119.856	2.40586	0.435119
597.787	398.525	199.262	108.689	2.1817	0.394578
623.7	415.8	207.9	113.4	2.27628	0.411683
584.071	389.381	194.69	106.195	2.13165	0.385525
578.313	385.542	192.771	105.148	2.11063	0.381724
654.582	436.388	218.194	119.015	2.38898	0.432067
639.3	426.2	213.1	116.236	2.33321	0.42198
597.418	398.279	199.139	108.621	2.18036	0.394335
658.757	439.171	219.586	119.774	2.40422	0.434823
645.529	430.353	215.176	117.369	2.35595	0.426091
651.929	434.62	217.31	118.533	2.3793	0.430316
645.248	430.165	215.083	117.318	2.35492	0.425906
622.185	414.79	207.395	113.124	2.27075	0.410682
656.822	437.881	218.941	119.422	2.39716	0.433545
533.13	355.42	177.71	96.9327	1.94573	0.3519
608.958	405.972	202.986	110.72	2.22247	0.401952
656.01	437.34	218.67	119.274	2.3942	0.433009
589.643	393.095	196.548	107.208	2.15198	0.389203
616.351	410.901	205.45	112.064	2.24946	0.406832
595.01	396.674	198.337	108.184	2.17157	0.392746
652.28	434.853	217.427	118.596	2.38058	0.430547
642.594	428.396	214.198	116.835	2.34523	0.424154
623.971	415.98	207.99	113.449	2.27726	0.411861
649.454	432.969	216.485	118.082	2.37027	0.428682
646.348	430.899	215.449	117.518	2.35893	0.426632
640.904	427.269	213.635	116.528	2.33906	0.423038
627.552	418.368	209.184	114.1	2.29034	0.414225
608.779	405.853	202.926	110.687	2.22182	0.401834
644.64	429.76	214.88	117.207	2.3527	0.425505
615.802	410.535	205.267	111.964	2.24745	0.406469
578.81	385.874	192.937	105.238	2.11245	0.382053
612.834	408.556	204.278	111.424	2.23662	0.40451
505.419	336.946	168.473	91.8944	1.84459	0.33361
579.472	386.314	193.157	105.358	2.11486	0.382489
580.816	387.211	193.605	105.603	2.11977	0.383376
644.655	429.77	214.885	117.21	2.35275	0.425514
622.825	415.217	207.608	113.241	2.27308	0.411105
590.443	393.629	196.814	107.353	2.1549	0.389731
647.842	431.895	215.947	117.79	2.36439	0.427618
542.941	361.96	180.98	98.7165	1.98153	0.358376
601.7	401.133	200.567	109.4	2.19598	0.397161
603.759	402.506	201.253	109.774	2.2035	0.39852
637.903	425.269	212.634	115.982	2.32811	0.421057
657.258	438.172	219.086	119.501	2.39875	0.433833
649.798	433.199	216.599	118.145	2.37153	0.428909
623.901	415.934	207.967	113.436	2.27701	0.411815
648.676	432.45	216.225	117.941	2.36743	0.428168
654.457	436.304	218.152	118.992	2.38853	0.431984
659.186	439.457	219.729	119.852	2.40579	0.435106
519.135	346.09	173.045	94.3881	1.89465	0.342663
659.299	439.532	219.766	119.872	2.4062	0.43518
617.684	411.789	205.895	112.306	2.25432	0.407711
603.742	402.494	201.247	109.771	2.20344	0.398509
477.684	318.456	159.228	86.8516	1.74337	0.315302
565.836	377.224	188.612	102.879	2.06509	0.373488
454.408	302.939	151.469	82.6197	1.65842	0.299939
575.772	383.848	191.924	104.686	2.10136	0.380047
644.005	429.337	214.668	117.092	2.35038	0.425085
650.718	433.812	216.906	118.312	2.37488	0.429516
611.079	407.386	203.693	111.105	2.23022	0.403352
644.335	429.557	214.778	117.152	2.35159	0.425303
652.973	435.315	217.658	118.722	2.38311	0.431005
653.341	435.561	217.78	118.789	2.38446	0.431248
650.889	433.926	216.963	118.343	2.37551	0.429629
657.906	438.604	219.302	119.619	2.40112	0.434261
573.877	382.585	191.292	104.341	2.09444	0.378796
565.944	377.296	188.648	102.899	2.06549	0.37356
641.387	427.591	213.796	116.616	2.34083	0.423357
644.54	429.693	214.847	117.189	2.35234	0.425438
625.47	416.98	208.49	113.722	2.28274	0.412851
633.456	422.304	211.152	115.174	2.31188	0.418122
613.963	409.309	204.654	111.63	2.24074	0.405256
628.969	419.313	209.656	114.358	2.29551	0.415161
651.01	434.006	217.003	118.365	2.37595	0.429709
616.546	411.031	205.515	112.099	2.25017	0.406961
595.362	396.908	198.454	108.248	2.17286	0.392978
561.145	374.097	187.048	102.026	2.04798	0.370393
536.239	357.493	178.746	97.498	1.95708	0.353953
596.465	397.644	198.822	108.448	2.17688	0.393706
605.04	403.36	201.68	110.007	2.20817	0.399366
557.281	371.52	185.76	101.324	2.03387	0.367842
609.429	406.286	203.143	110.805	2.22419	0.402263
654.609	436.406	218.203	119.02	2.38909	0.432085
636.272	424.181	212.091	115.686	2.32216	0.419981
655.25	436.833	218.417	119.136	2.39142	0.432508
647.798	431.866	215.933	117.782	2.36423	0.427589
539.074	359.383	179.691	98.0134	1.96742	0.355824
597.792	398.528	199.264	108.689	2.18172	0.394581
624.122	416.081	208.041	113.477	2.27782	0.411961
628.425	418.95	209.475	114.259	2.29352	0.414802
651.441	434.294	217.147	118.444	2.37752	0.429994
656.04	437.36	218.68	119.28	2.39431	0.433029
519.137	346.091	173.046	94.3885	1.89466	0.342664
556.559	371.039	185.52	101.193	2.03124	0.367365
655.925	437.283	218.642	119.259	2.39389	0.432953
639.389	426.259	213.13	116.253	2.33354	0.422038
636.614	424.41	212.205	115.748	2.32341	0.420207
647.513	431.675	215.838	117.73	2.36319	0.427401
618.752	412.501	206.251	112.5	2.25822	0.408417
612.586	408.39	204.195	111.379	2.23571	0.404346
630.476	420.318	210.159	114.632	2.30101	0.416156
639.262	426.175	213.087	116.229	2.33307	0.421954
585.806	390.537	195.269	106.51	2.13798	0.38667
647.536	431.69	215.845	117.734	2.36327	0.427416
631.218	420.812	210.406	114.767	2.30371	0.416645
613.683	409.122	204.561	111.579	2.23972	0.405071
558.79	372.527	186.263	101.598	2.03938	0.368838
495.682	330.454	165.227	90.1239	1.80906	0.327182
629.986	419.991	209.995	114.543	2.29922	0.415832
592.512	395.008	197.504	107.729	2.16245	0.391096
478.09	318.727	159.363	86.9255	1.74485	0.315571
566.084	377.389	188.695	102.924	2.066	0.373652
650.254	433.503	216.751	118.228	2.37319	0.42921

## Sheet: Late Maturation (5years)
EA	MA	LA	D+P	J	A
604.337	402.892	201.446	109.88	0.662288	0.689488
618.2	412.133	206.067	112.4	0.677479	0.705303
646.028	430.685	215.343	117.46	0.707976	0.737053
596.801	397.867	198.934	108.509	0.654028	0.680889			Stage	Name
653.56	435.707	217.853	118.829	0.71623	0.745646			EA	Early auricularia
612.027	408.018	204.009	111.278	0.670714	0.69826			MA	Mid auricularia
658.626	439.084	219.542	119.75	0.721782	0.751425			LA	Late auricularia
617.299	411.533	205.766	112.236	0.676492	0.704276			D+P	Doliolaria + pentactula
631.381	420.921	210.46	114.797	0.691925	0.720342			J	Juvenile
601.548	401.032	200.516	109.372	0.659231	0.686305			A	Adult
577.788	385.192	192.596	105.052	0.633193	0.659198
583.223	388.816	194.408	106.041	0.639149	0.665399
574.201	382.801	191.4	104.4	0.629261	0.655105
644.19	429.46	214.73	117.125	0.705962	0.734956			These results were obtained from GIM model software authors not have permissions tu upload software, this must be request to authors of the software
531.602	354.401	177.201	96.6548	0.582577	0.606504			Morales-Bojórquez E, Martínez-Aguilar S, Arreguín-Sánchez F, Ramírez-Rodríguez M. 2003. GIM, programa computarizado para estimar la mortalidad natural y duración de los estadios del ciclo de vida de recursos pesqueros, basado sobre división de tiempo gnomónico. Centro Regional de Investigación Pesquera de La Paz del INP, Centro Interdisciplinario de Ciencias Marinas del IPN. 19p.
594.725	396.484	198.242	108.132	0.651754	0.678521
655.698	437.132	218.566	119.218	0.718573	0.748085
627.668	418.445	209.223	114.121	0.687855	0.716105			Input Data were upload as Supplementary files ( Input_data.docx)
477.871	318.581	159.29	86.8857	0.523695	0.545203
580.405	386.937	193.468	105.528	0.63606	0.662183
631.205	420.803	210.402	114.764	0.691731	0.720141
547.829	365.219	182.61	99.6053	0.600361	0.625018
640.646	427.097	213.549	116.481	0.702078	0.730913
627.397	418.265	209.132	114.072	0.687559	0.715797
632.692	421.795	210.897	115.035	0.693362	0.721838
629.254	419.503	209.751	114.41	0.689593	0.717915
634.858	423.239	211.619	115.429	0.695735	0.724309
616.215	410.81	205.405	112.039	0.675304	0.703039
655.883	437.255	218.628	119.251	0.718776	0.748296
625.301	416.868	208.434	113.691	0.685262	0.713406
597.146	398.097	199.049	108.572	0.654407	0.681283
604.778	403.185	201.593	109.96	0.66277	0.68999
487.167	324.778	162.389	88.5758	0.533882	0.555809
658.989	439.326	219.663	119.816	0.72218	0.75184
655.896	437.264	218.632	119.254	0.71879	0.748311
474.862	316.575	158.287	86.3386	0.520397	0.54177
654.628	436.419	218.209	119.023	0.717401	0.746864
582.925	388.617	194.308	105.986	0.638822	0.665058
650.901	433.934	216.967	118.346	0.713316	0.742612
647.88	431.92	215.96	117.796	0.710005	0.739165
575.721	383.814	191.907	104.677	0.630927	0.65684
487.083	324.722	162.361	88.5606	0.53379	0.555713
647.098	431.399	215.699	117.654	0.709149	0.738274
609.107	406.071	203.036	110.747	0.667514	0.694929
655.451	436.967	218.484	119.173	0.718302	0.747803
644.653	429.769	214.884	117.21	0.706469	0.735484
600.538	400.359	200.179	109.189	0.658124	0.685153
626.083	417.388	208.694	113.833	0.686118	0.714297
458.72	305.813	152.907	83.4036	0.502707	0.523353
630.136	420.091	210.045	114.57	0.69056	0.718922
624.471	416.314	208.157	113.54	0.684352	0.712458
636.597	424.398	212.199	115.745	0.69764	0.726292
557.08	371.387	185.693	101.287	0.610498	0.635572
636.463	424.309	212.154	115.721	0.697494	0.72614
605.373	403.582	201.791	110.068	0.663422	0.690669
584.885	389.923	194.962	106.343	0.640969	0.667294
630.981	420.654	210.327	114.724	0.691485	0.719885
651.396	434.264	217.132	118.436	0.713859	0.743177
557.188	371.459	185.729	101.307	0.610617	0.635696
588.65	392.433	196.217	107.027	0.645096	0.67159
639.989	426.659	213.33	116.362	0.701358	0.730163
649.376	432.917	216.459	118.068	0.711645	0.740872
638.069	425.38	212.69	116.013	0.699254	0.727973
587.868	391.912	195.956	106.885	0.644239	0.670698
605.845	403.897	201.948	110.154	0.66394	0.691208
611.349	407.566	203.783	111.154	0.669971	0.697487
659.087	439.391	219.696	119.834	0.722287	0.751951
632.486	421.657	210.829	114.997	0.693135	0.721603
645.475	430.316	215.158	117.359	0.707369	0.736421
654.478	436.318	218.159	118.996	0.717236	0.746693
654.332	436.221	218.111	118.969	0.717076	0.746526
638.191	425.461	212.73	116.035	0.699387	0.728111
655.674	437.116	218.558	119.213	0.718546	0.748057
622.976	415.318	207.659	113.268	0.682714	0.710753
635.347	423.564	211.782	115.518	0.69627	0.724866
489.377	326.251	163.126	88.9776	0.536303	0.55833
633.131	422.087	211.044	115.115	0.693842	0.722338
655.503	437.002	218.501	119.182	0.718359	0.747862
553.172	368.781	184.391	100.577	0.606216	0.631113
512.118	341.412	170.706	93.1124	0.561225	0.584275
655.54	437.026	218.513	119.189	0.7184	0.747905
625.915	417.277	208.638	113.803	0.685934	0.714106
628.74	419.16	209.58	114.316	0.68903	0.717328
644.01	429.34	214.67	117.093	0.705764	0.73475
640	426.667	213.333	116.364	0.70137	0.730176
635.357	423.571	211.786	115.519	0.696282	0.724878
582.54	388.36	194.18	105.916	0.6384	0.664619
645.469	430.313	215.156	117.358	0.707363	0.736415
589.793	393.195	196.598	107.235	0.646348	0.672894
553.756	369.171	184.585	100.683	0.606856	0.63178
658.468	438.978	219.489	119.721	0.721608	0.751245
590.457	393.638	196.819	107.356	0.647076	0.673651
538.17	358.78	179.39	97.849	0.589775	0.613997
640.916	427.277	213.639	116.53	0.702374	0.731221
656.765	437.843	218.922	119.412	0.719742	0.749302
632.569	421.713	210.856	115.013	0.693226	0.721697
623.439	415.626	207.813	113.353	0.683221	0.711281
634.968	423.312	211.656	115.449	0.695855	0.724434
642.211	428.141	214.07	116.766	0.703793	0.732698
652.693	435.129	217.564	118.672	0.71528	0.744657
638.841	425.894	212.947	116.153	0.7001	0.728853
638.281	425.521	212.76	116.051	0.699486	0.728214
602.028	401.352	200.676	109.46	0.659757	0.686853
640.791	427.194	213.597	116.507	0.702237	0.731078
591.933	394.622	197.311	107.624	0.648694	0.675336
618.691	412.461	206.23	112.489	0.678017	0.705864
619.5	413	206.5	112.636	0.678904	0.706787
598.198	398.798	199.399	108.763	0.655559	0.682483
651.4	434.267	217.133	118.436	0.713863	0.743182
578.25	385.5	192.75	105.136	0.633699	0.659725
617.394	411.596	205.798	112.253	0.676596	0.704384
618.403	412.269	206.134	112.437	0.677702	0.705536
639.786	426.524	213.262	116.325	0.701135	0.729931
620.238	413.492	206.746	112.771	0.679713	0.707629
633.763	422.509	211.254	115.23	0.694535	0.72306
606.362	404.241	202.121	110.248	0.664506	0.691797
642.48	428.32	214.16	116.814	0.704087	0.733004
613.078	408.719	204.359	111.469	0.671867	0.699461
618.304	412.203	206.101	112.419	0.677594	0.705423
627.388	418.259	209.129	114.071	0.687549	0.715787
570.34	380.227	190.113	103.698	0.62503	0.650701
644.604	429.736	214.868	117.201	0.706416	0.735428
591.313	394.209	197.104	107.512	0.648015	0.674629
649.44	432.96	216.48	118.08	0.711715	0.740945
654.23	436.154	218.077	118.951	0.716965	0.746411
656.941	437.961	218.98	119.444	0.719935	0.749503
643.335	428.89	214.445	116.97	0.705025	0.73398
630.302	420.201	210.101	114.6	0.690742	0.719111
596.284	397.523	198.761	108.415	0.653462	0.6803
579.76	386.507	193.253	105.411	0.635354	0.661448
644.668	429.778	214.889	117.212	0.706485	0.735501
608.274	405.516	202.758	110.595	0.666601	0.693979
620.401	413.6	206.8	112.8	0.679891	0.707814
650.136	433.424	216.712	118.207	0.712478	0.741739
642.609	428.406	214.203	116.838	0.704229	0.733152
610.08	406.72	203.36	110.924	0.66858	0.696039
514.22	342.813	171.407	93.4945	0.563529	0.586673
616.41	410.94	205.47	112.074	0.675517	0.703261
627.766	418.511	209.255	114.139	0.687963	0.716218
622.524	415.016	207.508	113.186	0.682219	0.710237
598.974	399.316	199.658	108.904	0.65641	0.683369
551.213	367.475	183.738	100.221	0.604069	0.628879
580.63	387.087	193.543	105.569	0.636307	0.662441
621.637	414.424	207.212	113.025	0.681246	0.709225
638.173	425.449	212.724	116.032	0.699368	0.728091
655.875	437.25	218.625	119.25	0.718767	0.748287
642.696	428.464	214.232	116.854	0.704325	0.733252
649.315	432.877	216.438	118.057	0.711578	0.740803
591.839	394.559	197.28	107.607	0.648591	0.675229
644.176	429.451	214.725	117.123	0.705946	0.73494
538.043	358.695	179.348	97.8259	0.589636	0.613852
642.583	428.389	214.194	116.833	0.7042	0.733122
658.874	439.249	219.625	119.795	0.722054	0.751709
647.208	431.472	215.736	117.674	0.709269	0.738399
538.079	358.719	179.36	97.8325	0.589675	0.613893
635.637	423.758	211.879	115.57	0.696588	0.725197
547.178	364.786	182.393	99.487	0.599647	0.624275
648.427	432.285	216.142	117.896	0.710605	0.73979
558.572	372.381	186.191	101.559	0.612134	0.637274
655.977	437.318	218.659	119.268	0.718878	0.748403
620.731	413.821	206.91	112.86	0.680253	0.708191
511.02	340.68	170.34	92.9128	0.560022	0.583023
613.815	409.21	204.605	111.603	0.672674	0.700301
637.385	424.923	212.462	115.888	0.698504	0.727191
635.44	423.627	211.813	115.535	0.696373	0.724973
631.26	420.84	210.42	114.775	0.691792	0.720204
596.923	397.949	198.974	108.531	0.654162	0.681029
656.4	437.6	218.8	119.345	0.719342	0.748886
484.028	322.685	161.343	88.0051	0.530442	0.552227
652.905	435.27	217.635	118.71	0.715512	0.744899
556.766	371.177	185.589	101.23	0.610154	0.635213
639.514	426.342	213.171	116.275	0.700837	0.72962
597.525	398.35	199.175	108.641	0.654822	0.681716
652.415	434.943	217.472	118.621	0.714975	0.74434
654.872	436.581	218.291	119.068	0.717668	0.747142
610.14	406.76	203.38	110.935	0.668647	0.696109
639.98	426.654	213.327	116.36	0.701348	0.730153
641.298	427.532	213.766	116.6	0.702792	0.731656
532.139	354.759	177.38	96.7525	0.583166	0.607116
595.282	396.855	198.427	108.233	0.652364	0.679157
595.911	397.274	198.637	108.348	0.653054	0.679875
648.779	432.52	216.26	117.96	0.710991	0.740192
651.217	434.145	217.072	118.403	0.713663	0.742973
532.055	354.703	177.352	96.7373	0.583074	0.607021
643.593	429.062	214.531	117.017	0.705308	0.734275
590.724	393.816	196.908	107.404	0.647369	0.673957
609.185	406.124	203.062	110.761	0.6676	0.695019
617.593	411.729	205.864	112.29	0.676815	0.704612
647.108	431.405	215.703	117.656	0.709159	0.738284
658.385	438.923	219.462	119.706	0.721517	0.75115
550.322	366.881	183.441	100.058	0.603092	0.627862
637.213	424.809	212.404	115.857	0.698315	0.726995
626.15	417.433	208.717	113.845	0.686192	0.714374
630.937	420.624	210.312	114.716	0.691437	0.719835
599.648	399.765	199.883	109.027	0.657148	0.684137
566.49	377.66	188.83	102.998	0.620811	0.646308
641.973	427.982	213.991	116.722	0.703532	0.732427
607.171	404.781	202.39	110.395	0.665393	0.692721
647.766	431.844	215.922	117.776	0.70988	0.739035
600.892	400.595	200.297	109.253	0.658512	0.685558
626.083	417.389	208.694	113.833	0.686118	0.714297
595.848	397.232	198.616	108.336	0.652984	0.679802
601.876	401.251	200.625	109.432	0.65959	0.68668
656.346	437.564	218.782	119.336	0.719284	0.748825
592.71	395.14	197.57	107.765	0.649545	0.676222
653.136	435.424	217.712	118.752	0.715765	0.745162
610.778	407.186	203.593	111.051	0.669346	0.696836
594.473	396.316	198.158	108.086	0.651478	0.678234
615.366	410.244	205.122	111.885	0.674374	0.702071
652.024	434.682	217.341	118.55	0.714546	0.743893
549.114	366.076	183.038	99.8389	0.601769	0.626484
599.953	399.969	199.984	109.082	0.657483	0.684486
659.275	439.516	219.758	119.868	0.722493	0.752166
638.151	425.434	212.717	116.028	0.699344	0.728066
646.165	430.777	215.388	117.485	0.708126	0.737209
659.252	439.501	219.751	119.864	0.722468	0.75214
611.516	407.677	203.839	111.185	0.670154	0.697678
627.145	418.097	209.048	114.026	0.687283	0.71551
649.175	432.783	216.392	118.032	0.711424	0.740643
599.594	399.729	199.865	109.017	0.657089	0.684076
593.704	395.803	197.901	107.946	0.650635	0.677357
506.175	337.45	168.725	92.0318	0.554712	0.577495
549.634	366.423	183.211	99.9335	0.602339	0.627077
642.452	428.301	214.151	116.809	0.704057	0.732973
647.154	431.436	215.718	117.664	0.70921	0.738337
640.521	427.014	213.507	116.458	0.701941	0.73077
637.842	425.228	212.614	115.971	0.699005	0.727713
626.031	417.354	208.677	113.824	0.686062	0.714238
645.013	430.009	215.004	117.275	0.706864	0.735895
623.524	415.683	207.841	113.368	0.683314	0.711378
562.179	374.786	187.393	102.214	0.616086	0.641389
593.326	395.551	197.775	107.877	0.65022	0.676925
634.726	423.151	211.575	115.405	0.69559	0.724158
637.776	425.184	212.592	115.959	0.698932	0.727638
588.134	392.089	196.045	106.933	0.64453	0.671001
643.486	428.991	214.495	116.998	0.705191	0.734153
597.648	398.432	199.216	108.663	0.654957	0.681856
602.705	401.803	200.902	109.583	0.660499	0.687625
486.641	324.427	162.214	88.4801	0.533305	0.555208
639.946	426.631	213.315	116.354	0.701311	0.730114
644.366	429.577	214.789	117.157	0.706154	0.735156
605.036	403.357	201.679	110.006	0.663053	0.690284
640.877	427.251	213.626	116.523	0.702331	0.731176
572.706	381.804	190.902	104.128	0.627623	0.6534
609.552	406.368	203.184	110.828	0.668002	0.695437
599.771	399.847	199.924	109.049	0.657283	0.684278
511.09	340.727	170.363	92.9255	0.560099	0.583103
649.158	432.772	216.386	118.029	0.711406	0.740623
614.845	409.897	204.948	111.79	0.673803	0.701476
592.829	395.219	197.61	107.787	0.649676	0.676358
597.414	398.276	199.138	108.621	0.6547	0.681589
594.62	396.413	198.207	108.113	0.651638	0.678401
547.878	365.252	182.626	99.6142	0.600414	0.625073
611.647	407.765	203.882	111.209	0.670298	0.697827
656.676	437.784	218.892	119.396	0.719645	0.749201
656.334	437.556	218.778	119.333	0.71927	0.748811
636.012	424.008	212.004	115.638	0.696999	0.725625
639.896	426.597	213.299	116.345	0.701256	0.730056
626.966	417.977	208.989	113.994	0.687086	0.715305
641.599	427.733	213.866	116.654	0.703122	0.732
650.69	433.794	216.897	118.307	0.713085	0.742372
658.888	439.259	219.629	119.798	0.722069	0.751725
538.195	358.797	179.398	97.8536	0.589803	0.614026
563.433	375.622	187.811	102.442	0.617461	0.642821
618.557	412.372	206.186	112.465	0.677871	0.705711
512.584	341.723	170.861	93.1972	0.561736	0.584807
554.305	369.536	184.768	100.783	0.607457	0.632406
657.164	438.109	219.055	119.484	0.72018	0.749758
655.623	437.082	218.541	119.204	0.718491	0.748
504.619	336.413	168.206	91.749	0.553007	0.57572
592.551	395.034	197.517	107.737	0.649371	0.676041
650.773	433.849	216.924	118.322	0.713176	0.742466
619.953	413.302	206.651	112.719	0.6794	0.707303
648.956	432.637	216.319	117.992	0.711184	0.740393
643.416	428.944	214.472	116.985	0.705114	0.734073
550.099	366.733	183.366	100.018	0.602848	0.627607
650.344	433.563	216.781	118.244	0.712706	0.741977
564.115	376.077	188.038	102.566	0.618208	0.643598
609.428	406.285	203.143	110.805	0.667866	0.695295
590.981	393.987	196.994	107.451	0.64765	0.674249
628.3	418.867	209.433	114.236	0.688548	0.716827
579.692	386.461	193.231	105.399	0.635279	0.66137
654.777	436.518	218.259	119.05	0.717563	0.747034
636.516	424.344	212.172	115.73	0.697552	0.7262
576.088	384.058	192.029	104.743	0.631329	0.657258
610.631	407.087	203.544	111.024	0.669184	0.696668
655.857	437.238	218.619	119.247	0.718748	0.748267
620.417	413.612	206.806	112.803	0.679909	0.707833
603.443	402.295	201.148	109.717	0.661308	0.688468
544.947	363.298	181.649	99.0813	0.597202	0.62173
614.595	409.73	204.865	111.745	0.673529	0.701191
540.367	360.245	180.122	98.2485	0.592183	0.616504
559.113	372.742	186.371	101.657	0.612726	0.637891
580.349	386.9	193.45	105.518	0.635999	0.66212
645.265	430.177	215.088	117.321	0.707139	0.736182
634.924	423.283	211.641	115.441	0.695807	0.724384
509.488	339.659	169.829	92.6343	0.558344	0.581275
657.435	438.29	219.145	119.534	0.720477	0.750067
627.892	418.595	209.297	114.162	0.688101	0.716361
625.259	416.839	208.42	113.683	0.685216	0.713358
562.987	375.324	187.662	102.361	0.616972	0.642311
529.694	353.129	176.565	96.308	0.580486	0.604327
656.224	437.483	218.741	119.313	0.71915	0.748685
650.739	433.826	216.913	118.316	0.713139	0.742428
646.885	431.256	215.628	117.615	0.708915	0.73803
656.025	437.35	218.675	119.277	0.718932	0.748459
600.397	400.265	200.132	109.163	0.657969	0.684992
633.891	422.594	211.297	115.253	0.694675	0.723205
634.593	423.062	211.531	115.381	0.695444	0.724007
640.648	427.098	213.549	116.481	0.702079	0.730914
641.236	427.491	213.745	116.588	0.702725	0.731586
637.237	424.825	212.412	115.861	0.698342	0.727023
450.426	300.284	150.142	81.8957	0.493618	0.513891
500.78	333.854	166.927	91.051	0.5488	0.57134
587.033	391.355	195.678	106.733	0.643324	0.669745
651.997	434.665	217.332	118.545	0.714517	0.743862
637.371	424.914	212.457	115.886	0.698489	0.727176
596.71	397.807	198.903	108.493	0.653929	0.680786
626.823	417.882	208.941	113.968	0.686929	0.715142
647.305	431.537	215.768	117.692	0.709375	0.738509
614.494	409.662	204.831	111.726	0.673418	0.701075
618.091	412.061	206.03	112.38	0.67736	0.70518
637.211	424.807	212.404	115.857	0.698313	0.726993
619.145	412.763	206.382	112.572	0.678515	0.706381
631.98	421.32	210.66	114.906	0.692581	0.721026
650.029	433.353	216.676	118.187	0.712361	0.741618
518.944	345.963	172.981	94.3534	0.568706	0.592063
655.246	436.831	218.415	119.136	0.718078	0.74757
652.831	435.221	217.61	118.697	0.715431	0.744814
653.095	435.397	217.698	118.745	0.715721	0.745116
569.794	379.863	189.931	103.599	0.624432	0.650078
638.03	425.353	212.677	116.005	0.699211	0.727928
632.585	421.724	210.862	115.016	0.693244	0.721716
649.031	432.687	216.344	118.006	0.711267	0.740479
595.874	397.249	198.625	108.341	0.653012	0.679832
654.829	436.553	218.276	119.06	0.717621	0.747094
637.59	425.06	212.53	115.925	0.698729	0.727426
533.024	355.349	177.675	96.9134	0.584135	0.608126
633.683	422.455	211.228	115.215	0.694447	0.722968
611.748	407.832	203.916	111.227	0.670409	0.697943
623.969	415.979	207.99	113.449	0.683802	0.711885
638.791	425.86	212.93	116.144	0.700045	0.728796
653.524	435.683	217.841	118.823	0.716191	0.745605
626.981	417.987	208.994	113.996	0.687102	0.715322
653.636	435.757	217.879	118.843	0.716314	0.745733
615.956	410.637	205.319	111.992	0.67502	0.702744
599.634	399.756	199.878	109.024	0.657133	0.684121
585.748	390.499	195.249	106.5	0.641916	0.668279
635.861	423.908	211.954	115.611	0.696835	0.725454
626.184	417.456	208.728	113.852	0.686229	0.714413
562.61	375.073	187.537	102.293	0.616559	0.641881
600.19	400.127	200.063	109.126	0.657743	0.684757
632.22	421.48	210.74	114.949	0.692843	0.721299
655.724	437.15	218.575	119.223	0.718602	0.748115
549.055	366.037	183.018	99.8282	0.601704	0.626416
643.624	429.083	214.541	117.023	0.705342	0.734311
503.4	335.6	167.8	91.5273	0.551671	0.574329
651.245	434.163	217.082	118.408	0.713693	0.743005
612.984	408.656	204.328	111.452	0.671763	0.699352
651.636	434.424	217.212	118.479	0.714121	0.743451
642.393	428.262	214.131	116.799	0.703993	0.732906
607.047	404.698	202.349	110.372	0.665257	0.692579
631.675	421.117	210.558	114.85	0.692247	0.720677
513.93	342.62	171.31	93.4417	0.56321	0.586342
604.269	402.846	201.423	109.867	0.662212	0.68941
655.606	437.071	218.535	119.201	0.718472	0.74798
608.587	405.725	202.862	110.652	0.666945	0.694336
657.755	438.503	219.252	119.592	0.720828	0.750432
564.964	376.643	188.321	102.721	0.619139	0.644567
577.971	385.314	192.657	105.086	0.633393	0.659407
621.953	414.635	207.318	113.082	0.681592	0.709585
631.25	420.833	210.417	114.773	0.691781	0.720192
624.639	416.426	208.213	113.571	0.684536	0.71265
601.011	400.674	200.337	109.275	0.658643	0.685693
643.998	429.332	214.666	117.091	0.705751	0.734737
657.105	438.07	219.035	119.474	0.720115	0.749691
647.832	431.888	215.944	117.788	0.709953	0.739111
603.737	402.491	201.246	109.77	0.661629	0.688803
631.441	420.961	210.48	114.807	0.69199	0.72041
658.381	438.921	219.46	119.706	0.721513	0.751146
604.838	403.225	201.613	109.97	0.662836	0.690059
642.896	428.597	214.299	116.89	0.704543	0.733479
652.97	435.313	217.657	118.722	0.715584	0.744973
633.919	422.613	211.306	115.258	0.694706	0.723237
658.933	439.289	219.644	119.806	0.722118	0.751776
569.616	379.744	189.872	103.567	0.624237	0.649874
620.179	413.453	206.726	112.76	0.679649	0.707562
651.211	434.141	217.07	118.402	0.713656	0.742966
648.106	432.07	216.035	117.837	0.710253	0.739423
648.197	432.132	216.066	117.854	0.710353	0.739528
642.379	428.252	214.126	116.796	0.703977	0.732889
591.351	394.234	197.117	107.518	0.648056	0.674672
613.624	409.082	204.541	111.568	0.672464	0.700083
601.918	401.279	200.639	109.44	0.659636	0.686728
641.634	427.756	213.878	116.661	0.70316	0.732039
645.455	430.303	215.152	117.355	0.707347	0.736398
638.975	425.983	212.992	116.177	0.700247	0.729006
560.233	373.489	186.744	101.861	0.613954	0.63917
650.817	433.878	216.939	118.33	0.713224	0.742517
659.002	439.334	219.667	119.818	0.722193	0.751854
657.763	438.509	219.254	119.593	0.720836	0.750441
636.485	424.324	212.162	115.725	0.697518	0.726166
503.645	335.764	167.882	91.5719	0.55194	0.574609
601.146	400.764	200.382	109.299	0.65879	0.685847
635.191	423.461	211.73	115.489	0.6961	0.724689
650.238	433.492	216.746	118.225	0.712589	0.741855
656.189	437.459	218.73	119.307	0.719111	0.748645
648.345	432.23	216.115	117.881	0.710515	0.739696
644.701	429.801	214.9	117.218	0.706521	0.735538
605.373	403.582	201.791	110.068	0.663422	0.690669
658.094	438.73	219.365	119.654	0.721199	0.750819
599.733	399.822	199.911	109.042	0.657242	0.684235
616.208	410.805	205.403	112.038	0.675296	0.703031
517.491	344.994	172.497	94.0892	0.567113	0.590405
658.11	438.74	219.37	119.656	0.721217	0.750838
638.124	425.416	212.708	116.023	0.699314	0.728035
553.516	369.011	184.505	100.639	0.606593	0.631506
603.831	402.554	201.277	109.787	0.661732	0.68891
601.592	401.061	200.531	109.38	0.659278	0.686355
638.433	425.622	212.811	116.079	0.699653	0.728388
643.19	428.793	214.397	116.944	0.704866	0.733815
638.854	425.903	212.951	116.155	0.700114	0.728868
650.427	433.618	216.809	118.259	0.712796	0.742071
655.198	436.799	218.399	119.127	0.718025	0.747515
644.458	429.639	214.819	117.174	0.706255	0.735261
624.398	416.265	208.133	113.527	0.684272	0.712375
601.811	401.207	200.604	109.42	0.659518	0.686605
629.22	419.48	209.74	114.404	0.689556	0.717876
625.532	417.021	208.511	113.733	0.685514	0.713668
553.961	369.307	184.654	100.72	0.60708	0.632013
638.644	425.763	212.881	116.117	0.699884	0.728629
642.392	428.262	214.131	116.799	0.703992	0.732905
649.718	433.146	216.573	118.131	0.71202	0.741263
644.34	429.56	214.78	117.153	0.706126	0.735127
634.016	422.677	211.339	115.276	0.694812	0.723348
571.118	380.745	190.373	103.84	0.625882	0.651588
622.631	415.088	207.544	113.206	0.682336	0.71036
631.859	421.239	210.62	114.883	0.692448	0.720887
652.196	434.797	217.399	118.581	0.714735	0.74409
629.912	419.941	209.971	114.529	0.690315	0.718666
617.006	411.337	205.669	112.183	0.676171	0.703941
576.635	384.423	192.212	104.843	0.631928	0.657882
642.286	428.191	214.095	116.779	0.703875	0.732783
657.835	438.556	219.278	119.606	0.720915	0.750523
638.419	425.613	212.806	116.076	0.699638	0.728372
652.983	435.322	217.661	118.724	0.715598	0.744988
625.541	417.027	208.514	113.735	0.685524	0.713679
635.057	423.371	211.686	115.465	0.695953	0.724536
577.711	385.141	192.57	105.038	0.633108	0.65911
648.747	432.498	216.249	117.954	0.710955	0.740154
646.942	431.295	215.647	117.626	0.708978	0.738096
648.329	432.22	216.11	117.878	0.710498	0.739678
647.31	431.54	215.77	117.693	0.70938	0.738515
638.687	425.791	212.896	116.125	0.699931	0.728677
658.088	438.725	219.363	119.652	0.721192	0.750812
613.945	409.296	204.648	111.626	0.672816	0.700449
624.627	416.418	208.209	113.569	0.684523	0.712636
644.035	429.357	214.678	117.097	0.705792	0.734779
640.278	426.852	213.426	116.414	0.701675	0.730493
572.841	381.894	190.947	104.153	0.627771	0.653554
633.427	422.285	211.142	115.169	0.694167	0.722677
632.894	421.929	210.965	115.072	0.693582	0.722068
657.912	438.608	219.304	119.62	0.720999	0.750611
652.908	435.272	217.636	118.71	0.715515	0.744902
580.919	387.279	193.64	105.622	0.636624	0.66277
640.736	427.157	213.579	116.497	0.702177	0.731015
651.699	434.466	217.233	118.491	0.71419	0.743522
654.262	436.175	218.087	118.957	0.717	0.746447
592.012	394.675	197.337	107.639	0.64878	0.675426
613.669	409.112	204.556	111.576	0.672514	0.700134
645.304	430.203	215.101	117.328	0.707182	0.736226
642.868	428.579	214.289	116.885	0.704513	0.733447
518.463	345.642	172.821	94.266	0.568179	0.591514
496.002	330.668	165.334	90.1822	0.543564	0.565888
620.434	413.623	206.811	112.806	0.679928	0.707853
658.687	439.124	219.562	119.761	0.721848	0.751495
618.352	412.234	206.117	112.428	0.677646	0.705477
544.557	363.038	181.519	99.0103	0.596775	0.621284
587.77	391.847	195.923	106.867	0.644132	0.670586
592.722	395.148	197.574	107.768	0.649558	0.676236
656.148	437.432	218.716	119.3	0.719067	0.748599
555.735	370.49	185.245	101.043	0.609024	0.634037
653.159	435.439	217.72	118.756	0.71579	0.745188
603.446	402.297	201.149	109.717	0.66131	0.688471
640.299	426.866	213.433	116.418	0.701697	0.730516
456.391	304.261	152.13	82.9802	0.500155	0.520696
628.808	419.205	209.603	114.329	0.689104	0.717406
561.54	374.36	187.18	102.098	0.615386	0.640661
650.653	433.769	216.884	118.301	0.713045	0.742329
630.691	420.46	210.23	114.671	0.691168	0.719554
609.009	406.006	203.003	110.729	0.667407	0.694818
654.743	436.495	218.248	119.044	0.717526	0.746995
631.202	420.801	210.401	114.764	0.691728	0.720137
621.618	414.412	207.206	113.022	0.681226	0.709204
618.941	412.627	206.314	112.535	0.678292	0.706149
636.085	424.057	212.028	115.652	0.69708	0.725709
633.754	422.503	211.251	115.228	0.694525	0.723049
571.104	380.736	190.368	103.837	0.625868	0.651572
587.955	391.97	195.985	106.901	0.644335	0.670798
652.263	434.842	217.421	118.593	0.714809	0.744166
614.132	409.422	204.711	111.66	0.673022	0.700663
631.033	420.688	210.344	114.733	0.691543	0.719945
551.471	367.648	183.824	100.268	0.604352	0.629173
593.145	395.43	197.715	107.844	0.650021	0.676718
637.825	425.217	212.608	115.968	0.698986	0.727694
552.161	368.107	184.054	100.393	0.605108	0.62996
651.938	434.625	217.313	118.534	0.714453	0.743796
642.563	428.375	214.188	116.83	0.704178	0.733099
610.023	406.682	203.341	110.913	0.668519	0.695975
643.506	429.004	214.502	117.001	0.705213	0.734176
658.708	439.139	219.569	119.765	0.721872	0.751519
622.232	414.822	207.411	113.133	0.681899	0.709904
636.954	424.636	212.318	115.81	0.698032	0.726701
631.143	420.762	210.381	114.753	0.691664	0.720071
637.177	424.785	212.392	115.85	0.698276	0.726954
652.873	435.249	217.624	118.704	0.715477	0.744862
651.055	434.037	217.018	118.374	0.713485	0.742788
557.889	371.926	185.963	101.434	0.611385	0.636495
572.547	381.698	190.849	104.099	0.627449	0.653218
602.138	401.425	200.713	109.48	0.659877	0.686978
568.547	379.032	189.516	103.372	0.623066	0.648655
658.753	439.168	219.584	119.773	0.721921	0.75157
588.614	392.409	196.205	107.021	0.645056	0.671549
552.74	368.493	184.247	100.498	0.605742	0.63062
610.497	406.998	203.499	110.999	0.669038	0.696516
574.162	382.775	191.387	104.393	0.629219	0.655061
629.638	419.759	209.879	114.48	0.690015	0.718354
638.981	425.988	212.994	116.178	0.700254	0.729013
657.575	438.383	219.192	119.559	0.72063	0.750227
596.234	397.49	198.745	108.406	0.653408	0.680243
594.139	396.093	198.046	108.025	0.651111	0.677853
657.68	438.453	219.227	119.578	0.720745	0.750346
637.411	424.94	212.47	115.893	0.698532	0.727221
620.968	413.979	206.989	112.903	0.680513	0.708462
570.324	380.216	190.108	103.695	0.625012	0.650682
523.361	348.907	174.454	95.1565	0.573546	0.597102
603.401	402.267	201.134	109.709	0.661261	0.68842
647.355	431.57	215.785	117.701	0.70943	0.738567
560.741	373.827	186.914	101.953	0.614511	0.639749
596.058	397.372	198.686	108.374	0.653214	0.680042
588.403	392.268	196.134	106.982	0.644825	0.671308
643.395	428.93	214.465	116.981	0.70509	0.734049
580.629	387.086	193.543	105.569	0.636306	0.66244
656.589	437.726	218.863	119.38	0.719549	0.749101
624.841	416.561	208.28	113.608	0.684758	0.712881
627.142	418.094	209.047	114.026	0.687279	0.715505
631.786	421.191	210.595	114.87	0.692369	0.720804
632.426	421.617	210.809	114.987	0.69307	0.721534
574.359	382.906	191.453	104.429	0.629435	0.655286
647.945	431.963	215.982	117.808	0.710076	0.73924
631.041	420.694	210.347	114.735	0.691552	0.719954
658.585	439.056	219.528	119.743	0.721737	0.751378
646.746	431.164	215.582	117.59	0.708762	0.737871
629.231	419.487	209.744	114.406	0.689568	0.717889
657.439	438.292	219.146	119.534	0.720481	0.750071
598.572	399.048	199.524	108.831	0.655969	0.68291
630.528	420.352	210.176	114.641	0.69099	0.719369
624.046	416.03	208.015	113.463	0.683886	0.711973
632.404	421.603	210.801	114.983	0.693046	0.72151
647.733	431.822	215.911	117.77	0.709844	0.738998
639.662	426.442	213.221	116.302	0.701	0.72979
510.113	340.075	170.038	92.7478	0.559028	0.581987
634.587	423.058	211.529	115.38	0.695438	0.724
606.577	404.385	202.192	110.287	0.664742	0.692043
609.164	406.109	203.055	110.757	0.667577	0.694995
585.566	390.377	195.189	106.467	0.641716	0.668071
651.265	434.176	217.088	118.412	0.713715	0.743027
608.621	405.747	202.874	110.658	0.666981	0.694375
608.832	405.888	202.944	110.697	0.667214	0.694616
541.379	360.919	180.46	98.4326	0.593292	0.617659
612.218	408.146	204.073	111.312	0.670924	0.698479
622.547	415.031	207.516	113.19	0.682243	0.710263
548.139	365.426	182.713	99.6617	0.6007	0.625371
622.213	414.809	207.404	113.13	0.681878	0.709882
598.681	399.121	199.56	108.851	0.656089	0.683034
614.444	409.629	204.815	111.717	0.673363	0.701019
646.897	431.265	215.632	117.618	0.708928	0.738044
486.861	324.574	162.287	88.5202	0.533546	0.555459
536.849	357.9	178.95	97.609	0.588328	0.612491
632.827	421.885	210.942	115.059	0.693509	0.721992
618.19	412.127	206.063	112.398	0.677469	0.705293
626.752	417.835	208.917	113.955	0.686852	0.715061
640.43	426.953	213.477	116.442	0.701841	0.730665
654.769	436.513	218.256	119.049	0.717555	0.747025
630.301	420.201	210.1	114.6	0.690741	0.71911
603.221	402.147	201.074	109.677	0.661064	0.688214
563.189	375.459	187.73	102.398	0.617193	0.642542
651.934	434.623	217.311	118.533	0.714448	0.743791
649.139	432.76	216.38	118.025	0.711386	0.740603
535.809	357.206	178.603	97.4199	0.587188	0.611304
638.14	425.427	212.713	116.026	0.699332	0.728054
584.884	389.922	194.961	106.342	0.640968	0.667293
526.609	351.072	175.536	95.747	0.577105	0.600807
651.319	434.213	217.106	118.422	0.713774	0.743089
570.404	380.269	190.135	103.71	0.6251	0.650773
640.93	427.286	213.643	116.533	0.702389	0.731236
649.764	433.176	216.588	118.139	0.71207	0.741315
622.515	415.01	207.505	113.184	0.682208	0.710226
577.325	384.883	192.442	104.968	0.632685	0.65867
650.331	433.554	216.777	118.242	0.712691	0.741962
583.013	388.676	194.338	106.002	0.638919	0.665159
641.619	427.746	213.873	116.658	0.703144	0.732022
639.24	426.16	213.08	116.225	0.700537	0.729308
541.245	360.83	180.415	98.4083	0.593146	0.617506
599.005	399.337	199.668	108.91	0.656444	0.683405
592.575	395.05	197.525	107.741	0.649397	0.676068
657.704	438.47	219.235	119.583	0.720772	0.750374
634.386	422.924	211.462	115.343	0.695217	0.72377
642.633	428.422	214.211	116.842	0.704255	0.733179
609.086	406.057	203.029	110.743	0.667492	0.694906
652.547	435.031	217.516	118.645	0.71512	0.74449
659.166	439.444	219.722	119.848	0.722373	0.752041
657.005	438.003	219.002	119.455	0.720005	0.749576
578.463	385.642	192.821	105.175	0.633932	0.659968
652.981	435.321	217.66	118.724	0.715596	0.744986
617.388	411.592	205.796	112.252	0.67659	0.704377
652.798	435.199	217.599	118.691	0.715395	0.744777
648.677	432.451	216.226	117.941	0.710879	0.740075
657.281	438.187	219.094	119.506	0.720308	0.749891
651.324	434.216	217.108	118.423	0.71378	0.743095
540.778	360.519	180.259	98.3233	0.592634	0.616973
589.928	393.286	196.643	107.26	0.646497	0.673049
526.514	351.009	175.505	95.7298	0.577001	0.600699
649.626	433.084	216.542	118.114	0.711919	0.741157
494.113	329.409	164.704	89.8387	0.541494	0.563733
656.739	437.826	218.913	119.407	0.719714	0.749273
618.285	412.19	206.095	112.415	0.677572	0.705401
653.828	435.885	217.943	118.878	0.716524	0.745952
592.641	395.094	197.547	107.753	0.649469	0.676143
646.394	430.929	215.465	117.526	0.708377	0.73747
561.394	374.262	187.131	102.072	0.615226	0.640494
640.79	427.194	213.597	116.507	0.702236	0.731077
469.118	312.745	156.373	85.2941	0.514102	0.535216
599.146	399.431	199.715	108.936	0.656598	0.683565
647.92	431.947	215.973	117.804	0.71005	0.739211
603.331	402.22	201.11	109.696	0.661184	0.688339
636.785	424.523	212.262	115.779	0.697846	0.726507
538.907	359.272	179.636	97.9832	0.590583	0.614839
617.752	411.835	205.917	112.319	0.676988	0.704792
578.42	385.613	192.807	105.167	0.633885	0.659919
649.067	432.712	216.356	118.012	0.711307	0.74052
571.787	381.191	190.596	103.961	0.626615	0.652351
651.394	434.263	217.131	118.435	0.713857	0.743175
645.938	430.625	215.313	117.443	0.707877	0.73695
630.219	420.146	210.073	114.585	0.690651	0.719016
656.426	437.618	218.809	119.35	0.719371	0.748916
657.456	438.304	219.152	119.537	0.720499	0.750091
572.679	381.786	190.893	104.123	0.627593	0.653369
659.1	439.4	219.7	119.836	0.722301	0.751966
626.168	417.445	208.723	113.849	0.686212	0.714395
565.208	376.806	188.403	102.765	0.619406	0.644846
614.706	409.804	204.902	111.765	0.67365	0.701317
528.51	352.34	176.17	96.0927	0.579189	0.602976
638.537	425.691	212.846	116.098	0.699767	0.728506
654.028	436.019	218.009	118.914	0.716743	0.74618
644.795	429.863	214.932	117.235	0.706625	0.735646
652.722	435.148	217.574	118.677	0.715312	0.74469
535.442	356.961	178.481	97.3531	0.586786	0.610885
595.3	396.866	198.433	108.236	0.652383	0.679177
593.165	395.444	197.722	107.848	0.650044	0.676742
647.686	431.791	215.895	117.761	0.709793	0.738944
562.842	375.228	187.614	102.335	0.616813	0.642146
575.669	383.779	191.89	104.667	0.63087	0.65678
611.54	407.693	203.847	111.189	0.670181	0.697705
658.312	438.875	219.437	119.693	0.721438	0.751068
558.618	372.412	186.206	101.567	0.612184	0.637327
564.854	376.569	188.285	102.701	0.619018	0.644441
619.371	412.914	206.457	112.613	0.678763	0.70664
637.445	424.963	212.482	115.899	0.69857	0.727261
587.235	391.49	195.745	106.77	0.643545	0.669976
607.777	405.185	202.592	110.505	0.666057	0.693412
597.455	398.304	199.152	108.628	0.654746	0.681636
653.307	435.538	217.769	118.783	0.715953	0.745358
589.399	392.932	196.466	107.163	0.645916	0.672444
608.324	405.549	202.775	110.604	0.666656	0.694036
648.382	432.255	216.127	117.888	0.710555	0.739738
578.687	385.792	192.896	105.216	0.634178	0.660224
658.035	438.69	219.345	119.643	0.721134	0.750752
555.54	370.36	185.18	101.007	0.608811	0.633815
627.032	418.021	209.011	114.006	0.687158	0.71538
651.141	434.094	217.047	118.389	0.713579	0.742886
649.922	433.281	216.641	118.168	0.712243	0.741495
658.471	438.981	219.49	119.722	0.721612	0.751249
623.11	415.407	207.703	113.293	0.682861	0.710906
594.242	396.162	198.081	108.044	0.651225	0.677971
613.934	409.289	204.645	111.624	0.672804	0.700437
648.665	432.443	216.222	117.939	0.710866	0.740061
591.137	394.091	197.046	107.479	0.647822	0.674428
639.112	426.074	213.037	116.202	0.700396	0.729162
630.639	420.426	210.213	114.662	0.691112	0.719496
556.057	370.705	185.352	101.101	0.609378	0.634405
579.351	386.234	193.117	105.337	0.634905	0.660981
580.448	386.965	193.483	105.536	0.636107	0.662232
656.992	437.994	218.997	119.453	0.719991	0.749561
607.014	404.676	202.338	110.366	0.665221	0.692542
633.721	422.481	211.24	115.222	0.694489	0.723012
635.188	423.459	211.729	115.489	0.696096	0.724685
586.957	391.305	195.652	106.719	0.64324	0.669658
608.471	405.647	202.824	110.631	0.666817	0.694204
659.28	439.52	219.76	119.869	0.722499	0.752172
654.55	436.367	218.183	119.009	0.717315	0.746776
581.377	387.584	193.792	105.705	0.637125	0.663292
568.02	378.68	189.34	103.276	0.622488	0.648053
598.547	399.032	199.516	108.827	0.655942	0.682882
495.895	330.597	165.298	90.1628	0.543447	0.565766
637.861	425.241	212.62	115.975	0.699026	0.727735
653.378	435.585	217.793	118.796	0.716031	0.745438
648.879	432.586	216.293	117.978	0.711101	0.740306
657.666	438.444	219.222	119.576	0.720729	0.75033
535.943	357.295	178.648	97.4442	0.587335	0.611457
641.653	427.768	213.884	116.664	0.703181	0.732061
589.238	392.825	196.413	107.134	0.64574	0.672261
501.532	334.355	167.177	91.1877	0.549624	0.572198
627.876	418.584	209.292	114.159	0.688084	0.716343
577.271	384.847	192.424	104.958	0.632625	0.658607
593.401	395.601	197.8	107.891	0.650303	0.677011
596.707	397.805	198.902	108.492	0.653926	0.680782
548.876	365.917	182.959	99.7956	0.601508	0.626212
625.496	416.997	208.499	113.726	0.685475	0.713627
615.682	410.454	205.227	111.942	0.67472	0.702431
502.074	334.716	167.358	91.2862	0.550218	0.572816
640.269	426.846	213.423	116.413	0.701664	0.730482
656.105	437.403	218.702	119.292	0.719019	0.748549
562.197	374.798	187.399	102.218	0.616106	0.64141
654.429	436.286	218.143	118.987	0.717182	0.746637
616.48	410.987	205.493	112.087	0.675595	0.703342
654.824	436.55	218.275	119.059	0.717616	0.747088
614.47	409.647	204.823	111.722	0.673392	0.701048
609.702	406.468	203.234	110.855	0.668166	0.695608
638.697	425.798	212.899	116.127	0.699942	0.728689
568.179	378.786	189.393	103.305	0.622662	0.648235
622.976	415.318	207.659	113.268	0.682714	0.710753
651.254	434.169	217.085	118.41	0.713703	0.743015
651.253	434.169	217.084	118.41	0.713702	0.743014
640.528	427.019	213.509	116.46	0.701949	0.730778
634.208	422.805	211.403	115.31	0.695022	0.723567
647.439	431.626	215.813	117.716	0.709522	0.738662
643.882	429.255	214.627	117.07	0.705624	0.734605
652.749	435.166	217.583	118.682	0.715342	0.744721
609.888	406.592	203.296	110.889	0.66837	0.695821
511.274	340.849	170.425	92.9589	0.5603	0.583312
596.692	397.795	198.897	108.49	0.653909	0.680766
470.91	313.94	156.97	85.62	0.516066	0.537261
628.651	419.1	209.55	114.3	0.688932	0.717227
579.834	386.556	193.278	105.424	0.635434	0.661532
607.553	405.036	202.518	110.464	0.665812	0.693157
637.558	425.038	212.519	115.92	0.698693	0.727389
634.639	423.092	211.546	115.389	0.695494	0.724059
595.168	396.779	198.389	108.212	0.652239	0.679027
616.585	411.057	205.528	112.106	0.67571	0.703462
627.52	418.347	209.173	114.095	0.687693	0.715937
581.363	387.575	193.788	105.702	0.63711	0.663276
635.566	423.71	211.855	115.557	0.69651	0.725116
652.552	435.035	217.517	118.646	0.715125	0.744496
589.565	393.043	196.522	107.194	0.646099	0.672634
653.815	435.877	217.938	118.876	0.71651	0.745937
658.719	439.146	219.573	119.767	0.721884	0.751532
652.756	435.171	217.585	118.683	0.715349	0.744729
649.363	432.908	216.454	118.066	0.71163	0.740857
656.663	437.775	218.888	119.393	0.71963	0.749186
651.108	434.072	217.036	118.383	0.713542	0.742848
609.145	406.097	203.048	110.754	0.667556	0.694973
650.226	433.484	216.742	118.223	0.712576	0.741842
631	420.667	210.333	114.727	0.691507	0.719907
638.948	425.965	212.983	116.172	0.700217	0.728975
575.961	383.974	191.987	104.72	0.63119	0.657113
646.294	430.862	215.431	117.508	0.708267	0.737356
511.076	340.717	170.359	92.9229	0.560083	0.583086
651.034	434.022	217.011	118.37	0.713461	0.742764
635.314	423.543	211.771	115.512	0.696234	0.724829
631.428	420.952	210.476	114.805	0.691976	0.720396
604.281	402.854	201.427	109.869	0.662226	0.689424
648.711	432.474	216.237	117.947	0.710916	0.740114
616.005	410.67	205.335	112.001	0.675074	0.702799
604.774	403.183	201.591	109.959	0.662766	0.689986
621.265	414.177	207.088	112.957	0.680838	0.7088
635.631	423.754	211.877	115.569	0.696582	0.725191
658.222	438.815	219.407	119.677	0.721339	0.750965
651.342	434.228	217.114	118.426	0.7138	0.743116
648.254	432.169	216.085	117.864	0.710415	0.739592
636.559	424.373	212.186	115.738	0.697599	0.72625
615.298	410.199	205.099	111.872	0.674299	0.701993
618.005	412.004	206.002	112.365	0.677266	0.705082
634.617	423.078	211.539	115.385	0.695471	0.724034
638.471	425.647	212.824	116.086	0.699694	0.728431
590.416	393.61	196.805	107.348	0.647031	0.673605
648.436	432.291	216.145	117.897	0.710615	0.7398
636.886	424.591	212.295	115.797	0.697957	0.726623
649.096	432.731	216.365	118.017	0.711338	0.740553
640.296	426.864	213.432	116.417	0.701694	0.730512
643.787	429.191	214.596	117.052	0.70552	0.734496
611.413	407.609	203.804	111.166	0.670042	0.697561
590.878	393.919	196.959	107.432	0.647537	0.674132
639.745	426.497	213.248	116.317	0.701091	0.729885
618.038	412.025	206.013	112.371	0.677302	0.705119
556.198	370.799	185.399	101.127	0.609532	0.634566
499.792	333.194	166.597	90.8712	0.547717	0.570212
554.926	369.951	184.975	100.896	0.608138	0.633115
654.546	436.364	218.182	119.008	0.717311	0.746771
653.413	435.609	217.804	118.802	0.71607	0.745479
583.276	388.85	194.425	106.05	0.639206	0.665459
611.119	407.412	203.706	111.112	0.669719	0.697225
634.554	423.036	211.518	115.373	0.695402	0.723962
627.193	418.128	209.064	114.035	0.687334	0.715563
657.94	438.626	219.313	119.625	0.72103	0.750643
639.769	426.513	213.256	116.322	0.701117	0.729912
658.5	439	219.5	119.727	0.721644	0.751282
626.947	417.965	208.982	113.99	0.687065	0.715283
557.636	371.757	185.879	101.388	0.611108	0.636206
654.19	436.127	218.063	118.944	0.716921	0.746365
620.259	413.506	206.753	112.774	0.679735	0.707652
621.363	414.242	207.121	112.975	0.680946	0.708912
649.77	433.18	216.59	118.14	0.712077	0.741322
628.358	418.905	209.453	114.247	0.688612	0.716893
649.433	432.955	216.478	118.079	0.711708	0.740938
607.828	405.219	202.609	110.514	0.666113	0.693471
598.444	398.963	199.481	108.808	0.655829	0.682764
641.63	427.753	213.877	116.66	0.703156	0.732035
633.292	422.195	211.097	115.144	0.694019	0.722522
532.346	354.897	177.449	96.7902	0.583393	0.607353
640.236	426.824	213.412	116.407	0.701628	0.730444
537.066	358.044	179.022	97.6483	0.588565	0.612738
540.767	360.511	180.256	98.3212	0.592621	0.61696
639.487	426.325	213.162	116.27	0.700808	0.72959
631.899	421.266	210.633	114.891	0.692492	0.720933
628.333	418.889	209.444	114.242	0.688584	0.716865
624.398	416.265	208.133	113.527	0.684272	0.712375
647.82	431.88	215.94	117.785	0.709939	0.739097
650.634	433.756	216.878	118.297	0.713023	0.742307
626.13	417.42	208.71	113.842	0.68617	0.714351
595.681	397.121	198.56	108.306	0.652801	0.679612
655.337	436.892	218.446	119.152	0.718178	0.747674
654.312	436.208	218.104	118.966	0.717054	0.746504
653.581	435.72	217.86	118.833	0.716253	0.745669
568.774	379.182	189.591	103.413	0.623314	0.648913
645.648	430.432	215.216	117.391	0.70756	0.736619
584.262	389.508	194.754	106.23	0.640287	0.666584
634.82	423.213	211.607	115.422	0.695693	0.724265
616.178	410.785	205.393	112.032	0.675263	0.702997
601.109	400.739	200.37	109.293	0.65875	0.685805
626.467	417.644	208.822	113.903	0.686539	0.714735
606.232	404.155	202.077	110.224	0.664364	0.691649
653.245	435.497	217.748	118.772	0.715885	0.745287
640.674	427.116	213.558	116.486	0.702108	0.730944
649.872	433.248	216.624	118.158	0.712188	0.741438
646.612	431.074	215.537	117.566	0.708615	0.737718
598.496	398.997	199.499	108.817	0.655886	0.682824
623.112	415.408	207.704	113.293	0.682863	0.710908
646.933	431.289	215.644	117.624	0.708968	0.738085
643.095	428.73	214.365	116.926	0.704762	0.733707
608.877	405.918	202.959	110.705	0.667262	0.694667
636.899	424.599	212.3	115.8	0.697971	0.726637
612.486	408.324	204.162	111.361	0.671217	0.698784
636.1	424.067	212.033	115.655	0.697096	0.725726
655.006	436.671	218.335	119.092	0.717815	0.747296
526.593	351.062	175.531	95.7442	0.577088	0.60079
625.788	417.192	208.596	113.78	0.685795	0.713961
620.78	413.853	206.927	112.869	0.680307	0.708248
597.694	398.463	199.231	108.672	0.655007	0.681909
592.099	394.733	197.366	107.654	0.648876	0.675525
565.788	377.192	188.596	102.871	0.620042	0.645507
645.235	430.157	215.078	117.315	0.707107	0.736148
656.898	437.932	218.966	119.436	0.719888	0.749454
643.748	429.165	214.583	117.045	0.705477	0.734451
611.88	407.92	203.96	111.251	0.670553	0.698093
636.843	424.562	212.281	115.79	0.69791	0.726573
659.151	439.434	219.717	119.846	0.722357	0.752025
650.644	433.762	216.881	118.299	0.713034	0.742319
570.379	380.253	190.126	103.705	0.625073	0.650745
567.198	378.132	189.066	103.127	0.621587	0.647116
639.64	426.426	213.213	116.298	0.700975	0.729764
644.201	429.467	214.734	117.127	0.705974	0.734968
616.564	411.043	205.521	112.103	0.675687	0.703438
585.795	390.53	195.265	106.508	0.641967	0.668333
596.976	397.984	198.992	108.541	0.65422	0.68109
606.344	404.23	202.115	110.244	0.664487	0.691778
608.22	405.48	202.74	110.586	0.666543	0.693918
657.564	438.376	219.188	119.557	0.720619	0.750215
633.645	422.43	211.215	115.208	0.694406	0.722925
557.172	371.448	185.724	101.304	0.6106	0.635678
588.914	392.609	196.305	107.075	0.645385	0.671891
650.692	433.795	216.897	118.308	0.713087	0.742374
641.006	427.337	213.669	116.546	0.702472	0.731323
541.631	361.087	180.544	98.4784	0.593568	0.617946
629.456	419.637	209.819	114.447	0.689815	0.718146
627.164	418.109	209.055	114.03	0.687303	0.715531
571.921	381.281	190.64	103.986	0.626763	0.652504
555.844	370.562	185.281	101.062	0.609144	0.634161
630.376	420.25	210.125	114.614	0.690823	0.719195
582.314	388.209	194.105	105.875	0.638153	0.664362
576.627	384.418	192.209	104.841	0.63192	0.657874
524.613	349.742	174.871	95.3841	0.574918	0.59853
577.792	385.195	192.597	105.053	0.633197	0.659203
656.865	437.91	218.955	119.43	0.719852	0.749417
647.717	431.811	215.906	117.767	0.709827	0.73898
652.624	435.083	217.541	118.659	0.715204	0.744578
652.209	434.806	217.403	118.583	0.71475	0.744105
605.715	403.81	201.905	110.13	0.663797	0.691059
597.421	398.281	199.14	108.622	0.654708	0.681597
579.288	386.192	193.096	105.325	0.634836	0.660909
658.884	439.256	219.628	119.797	0.722065	0.75172
656.361	437.574	218.787	119.338	0.7193	0.748842
523.605	349.07	174.535	95.2009	0.573814	0.59738
508.967	339.311	169.656	92.5394	0.557772	0.580679
545.594	363.729	181.865	99.1989	0.597911	0.622468
633.625	422.417	211.208	115.205	0.694384	0.722902
628.49	418.993	209.497	114.271	0.688756	0.717043
658.773	439.182	219.591	119.777	0.721943	0.751594
657.424	438.283	219.141	119.532	0.720465	0.750055
602.973	401.982	200.991	109.631	0.660792	0.687931
611.986	407.99	203.995	111.27	0.670669	0.698214
622.074	414.716	207.358	113.104	0.681725	0.709724
572.302	381.535	190.767	104.055	0.62718	0.652939
648.148	432.099	216.049	117.845	0.7103	0.739472
611.538	407.692	203.846	111.189	0.670179	0.697703
528.604	352.403	176.201	96.1098	0.579292	0.603084
640.788	427.192	213.596	116.507	0.702234	0.731075
637.222	424.815	212.407	115.859	0.698325	0.727006
587.914	391.942	195.971	106.893	0.644289	0.67075
618.132	412.088	206.044	112.388	0.677405	0.705226
648.54	432.36	216.18	117.916	0.710729	0.739919
657.789	438.526	219.263	119.598	0.720865	0.750471
635.425	423.616	211.808	115.532	0.696356	0.724955
532.733	355.155	177.578	96.8606	0.583817	0.607795
606.808	404.539	202.269	110.329	0.664995	0.692307
640.709	427.139	213.57	116.492	0.702146	0.730984
635.462	423.641	211.821	115.539	0.696397	0.724998
615.49	410.327	205.163	111.907	0.674509	0.702212
580.322	386.882	193.441	105.513	0.63597	0.662089
655.337	436.891	218.446	119.152	0.718178	0.747673
618.444	412.296	206.148	112.444	0.677747	0.705582
628.477	418.985	209.492	114.269	0.688742	0.717029
626.899	417.932	208.966	113.982	0.687012	0.715228
635.957	423.971	211.986	115.629	0.696939	0.725563
647.851	431.901	215.95	117.791	0.709974	0.739132
653.925	435.95	217.975	118.896	0.716631	0.746063
646.626	431.084	215.542	117.568	0.708631	0.737735
652.736	435.157	217.579	118.679	0.715327	0.744706
582.11	388.073	194.037	105.838	0.637929	0.664129
632.597	421.731	210.866	115.018	0.693257	0.721729
632.942	421.961	210.981	115.08	0.693635	0.722123
640.278	426.852	213.426	116.414	0.701674	0.730492
657.603	438.402	219.201	119.564	0.720661	0.750258
620.591	413.727	206.864	112.835	0.680099	0.708031
622.699	415.133	207.566	113.218	0.68241	0.710436
650.267	433.511	216.756	118.23	0.712621	0.741888
621.388	414.259	207.129	112.98	0.680973	0.708941
656.747	437.832	218.916	119.409	0.719723	0.749282
654.558	436.372	218.186	119.011	0.717324	0.746785
652.715	435.143	217.572	118.675	0.715304	0.744682
627.532	418.355	209.177	114.097	0.687707	0.715951
654.747	436.498	218.249	119.045	0.717531	0.747
509.248	339.498	169.749	92.5905	0.55808	0.581
606.467	404.311	202.156	110.267	0.664621	0.691917
650.273	433.515	216.758	118.231	0.712628	0.741895
637.22	424.813	212.407	115.858	0.698323	0.727003
574.321	382.881	191.44	104.422	0.629393	0.655242
600.201	400.134	200.067	109.127	0.657754	0.684768
612.663	408.442	204.221	111.393	0.671411	0.698986
459.677	306.452	153.226	83.5777	0.503756	0.524445
629.056	419.37	209.685	114.374	0.689376	0.717689
595.777	397.184	198.592	108.323	0.652906	0.679721
632.287	421.525	210.762	114.961	0.692918	0.721376
658.427	438.951	219.476	119.714	0.721564	0.751198
656.434	437.623	218.811	119.352	0.71938	0.748925
568.336	378.891	189.445	103.334	0.622834	0.648414
607.302	404.868	202.434	110.419	0.665537	0.69287
611.747	407.832	203.916	111.227	0.670408	0.697942
627.893	418.595	209.298	114.162	0.688102	0.716362
657.056	438.037	219.019	119.465	0.720061	0.749634
504.625	336.416	168.208	91.7499	0.553013	0.575726
593.042	395.361	197.681	107.826	0.649909	0.6766
602.008	401.339	200.669	109.456	0.659735	0.68683
454.108	302.739	151.369	82.5651	0.497653	0.518091
654.473	436.315	218.158	118.995	0.717231	0.746688
573.453	382.302	191.151	104.264	0.628441	0.654252
596.028	397.352	198.676	108.369	0.653181	0.680008
490.184	326.79	163.395	89.1245	0.537188	0.559251
610.192	406.795	203.397	110.944	0.668704	0.696168
609.562	406.375	203.187	110.829	0.668013	0.695449
559.816	373.21	186.605	101.785	0.613496	0.638693
619.267	412.845	206.422	112.594	0.678649	0.706521
623.484	415.656	207.828	113.361	0.683271	0.711333
642.161	428.108	214.054	116.757	0.703739	0.732641
618.166	412.11	206.055	112.394	0.677442	0.705265
644.328	429.552	214.776	117.151	0.706113	0.735114
652.061	434.708	217.354	118.557	0.714588	0.743936
567.599	378.399	189.2	103.2	0.622026	0.647573
610.379	406.919	203.46	110.978	0.668909	0.696381
650.701	433.801	216.9	118.309	0.713097	0.742384
604.963	403.308	201.654	109.993	0.662973	0.690201
525.714	350.476	175.238	95.5844	0.576125	0.599787
604.394	402.929	201.465	109.89	0.662349	0.689552
545.185	363.457	181.728	99.1246	0.597463	0.622001
623.284	415.523	207.761	113.324	0.683051	0.711104
648.987	432.658	216.329	117.998	0.711219	0.740429
631.353	420.902	210.451	114.791	0.691894	0.72031
651.83	434.553	217.277	118.514	0.714334	0.743672
654.125	436.083	218.042	118.932	0.71685	0.746291
659.1	439.4	219.7	119.836	0.722302	0.751967
